# TMEM132A ensures mouse caudal neural tube closure and regulates integrin-based mesodermal migration

Binbin Li, Liza Brusman, Jacob Dahlka and Lee Ann Niswander\*

Department of Molecular, Cellular and Developmental Biology, University of Colorado Boulder, Boulder, CO 80309, United States

\*Correspondence: lee.niswander@colorado.edu

## Abstract

Coordinated migration of the mesoderm is essential for accurate organization of the body plan during embryogenesis. However, little is known about how mesoderm migration influences posterior neural tube closure in mammals. Here we show that spinal neural tube closure and lateral migration of the caudal paraxial mesoderm depend on Transmembrane protein 132A (TMEM132A), a single-pass type I transmembrane protein, the function of which is not fully understood. Our study in *Tmem132a*-null mice and cell models demonstrates that TMEM132A regulates several integrins and downstream integrin pathway activation as well as cell migration behaviors. Our data also implicates mesoderm migration in elevation of the caudal neural folds and successful closure of the caudal neural tube. These results suggest a requirement for paraxial mesodermal cell migration during spinal neural tube closure, disruption of which may lead to spinal bifida.

**Keywords:** Transmembrane protein 132A (TMEM132A), Neural tube closure, Spina bifida, Mesodermal cell migration, Integrin pathway, Cytoskeletal remodeling.

## Introduction

Neural tube closure is a fundamental process of morphogenesis that culminates in the elevation, apposition and fusion of the neural folds in the dorsal midline (Wilde et al., 2014). The neural tube is the embryonic precursor of the brain and spinal cord, and when the neural tube does not close properly, neural tube defects (NTDs) occur. NTDs are a common malformation worldwide affecting approximately 1 in 1000 live births and causing severe childhood morbidity and mortality (Greene and Copp, 2014). Maternal prenatal folic acid supplementation can reduce the incidence of NTDs, which is now implemented in many countries (Wald et al., 2018; Wilde et al., 2014). However, folic acid supplementation in humans and animal models have not approached 100% NTD prevention, and at least one-third of NTDs are not folate responsive (Greene and Copp, 2014). Hence, NTDs remain of high clinical significance. Thus, elucidating the molecular mechanisms that control neural tube closure is of great relevance.

The Knockout Mouse Project (KOMP) under the International Mouse Phenotyping Consortium (IMPC) created Transmembrane protein 132a (*Tmem132a*)-null mice and homozygous mutant embryos show spina bifida and limb defects. TMEM132A is a single-pass type I transmembrane protein which was first identified as an interacting protein with the ER resident chaperone 78-kDa glucose-regulated protein GRP78, also called BIP or HSPA5, and was named GRP78 binding protein (GBP) and HSPA5 binding protein 1 (HSPA5BP1) (Oh-hashii et al., 2010; Oh-hashii et al., 2003). The TMEM132 family is composed of five members (TMEM132A to E), the structure and molecular function of which are under-investigated. TMEM132B is linked to intracranial aneurysm and excessive daytime sleepiness (Farlow et al., 2015; Lane et al., 2017). TMEM132D variants are reported in lifetime prevalence of panic disorder (Erhardt et al., 2012; Haaker et al., 2014; Quast et al., 2012; Shimada-Sugimoto et al., 2016). TMEM132E is associated with autosomal-recessive nonsyndromic hearing impairment (Li et al., 2015; Liaqat et al., 2020). To date, TMEM132A or C have not been associated with human diseases. Knockdown of TMEM132A increased resistance to cell death induced by serum starvation in cultured cells (Oh-hashii et al., 2010). Our previous study identified TMEM132A as a regulator of Wnt signaling by interacting with the Wnt ligand trafficking protein Wntless (WLS) (Li and Niswander, 2020). Wnt signaling is important in neuromesodermal progenitor (NMP) self-renewal as well as lineage choice to neural and mesodermal tissue of the trunk (Garriock et al., 2015; Gouti et al., 2017; Gouti et al., 2014). However, our data suggest the spina bifida phenotype is unrelated to NMP differentiation, indicating a different function of TMEM132A during mammalian caudal neural tube closure.

Here, we systematically investigated the role of TMEM132A in NTD pathogenesis in the mouse. *Tmem132a*<sup>-/-</sup> embryos die prenatally and show ~85% penetrance of spina bifida. Mutant embryos exhibit severely impaired lateral migration of the paraxial mesoderm in the posterior trunk. Molecularly, TMEM132A regulates the levels of several integrin proteins and activates the integrin pathway, with consequent effects on cytoskeletal remodeling. Together our studies indicate TMEM132A ensures successful paraxial mesoderm migration, failure of which contributes to spina bifida.

## Results and discussion

### ***Tmem132a* deletion causes embryonic lethality and caudal neural tube defects**

The *Tmem132a*<sup>tm1b(KOMP)Wtsi</sup> mouse was generated by Baylor College of Medicine and obtained from KOMP. This allele removes exons 2 and 3 of Transmembrane protein 132a (TMEM132A, MGI:2147810) and introduces En2 splice acceptor (SA),  $\beta$ -galactosidase (LacZ) and a polyadenylation signal (pA) sequence to create a presumed null allele (Fig. 1A-C). Homozygous deletion of *Tmem132a* in mice results in defects in multiple tissues including the neural tube and limbs (Fig. 1D, Fig. S1A). *Tmem132a* homozygous mutant pups were never observed alive, but embryos survived at least to Embryonic day 18.5 (E18.5). The cause of lethality was not explored. Over 85% mutant embryos at E10.5 showed severe caudal NTD of spina bifida, extending posteriorly from the hindlimb level, with curly or missing tail (Fig. 1E). Almost every embryo showed digits shortage in both the forelimbs and hindlimbs (Fig. S1A), and occasionally one or both hindlimbs were missing. Homozygous mutants were

developmentally delayed, as judged by fewer somites compared to littermates (E8.5-10.5; Fig. S1B) but were morphologically normal for any given somite age beyond NTD and limb defects. At E18.5, mutants remained growth retarded based on body and brain weight (Fig. S1C). To determine whether NTD could be prevented by folic acid, female and male mice were fed control (2 ppm) or folic acid supplemented (10 ppm) diets recapitulating serum levels in humans (Marean et al., 2011) over multiple generations and F3 embryos examined. NTD severity or penetrance was not affected (Fig. S1D), indicating that loss of TMEM132A cannot be rescued by folic acid supplementation. These results indicate that TMEM132A plays critical roles in mammalian embryogenesis, particularly caudal neural tube closure and limb development.

### **TMEM132A is required for lateral migration of caudal paraxial mesodermal cells**

To determine the temporal and spatial expression pattern of TMEM132A during neural tube closure, we examined E8.5-10.5 embryos for  $\beta$ -galactosidase expression (Fig. 2A) or RNA in-situ hybridization (ISH, Fig. S2A). Expression of TMEM132A is widespread with stronger expression in neuroepithelium, limb buds, mesoderm and endoderm.

Focusing on E9.5 embryos during caudal neural tube closure, the length of the posterior neuropore (PNP) is significantly increased in mutants (Fig. 2B), with a markedly convex and everted appearance of the neuroepithelium (NE) (Fig. 2C). Transverse sections around the PNP zipper point showed the presence of all tissues - NE, non-neural ectoderm or surface ectoderm (SE), notochord (NC), mesoderm and endoderm in mutants (Fig. 2C & D). However, the medial hinge point (MHP) is severely disrupted, exhibiting reversed bending of the NE overlaying the NC. Anteriorly where the neural tube has closed, the pair of dorsal-lateral hinge points (DLHPs) form in the proper direction but the degree of bending is greatly exaggerated. In regions where the neural folds remain open, the NE is everted in mutant embryos, compared to wildtype where the neural folds are elevated to ultimately bring them into apposition to fuse. Strikingly, mutants have a mass of mesoderm-like cells underneath the medial NE and NC, whereas normally the mesoderm migrates anteriorly and laterally to form the paraxial mesoderm/somites. In wildtype embryos there is little to no mesodermal tissue left between NE/NC and endothelial tissues at the midline.

To assess the lineage of the abnormally localized mesoderm-like cells, we used various molecular markers. Trunk NE and adjacent paraxial mesoderm arise from shared, dual-fated neuromesodermal progenitors (NMPs) marked by co-expression of neural progenitor cell (NPC) regulator Sox2 and pan-mesodermal transcription factor Brachyury (T) (Henrique et al., 2015; Rodrigo Albors and Storey, 2016). The antagonistic activities of Sox2 and T control NMP fate choice into neural or mesodermal lineage (Gouti et al., 2017; Gouti et al., 2014; Koch et al., 2017). An imbalance in NMP differentiation, for instance mutations that impact pathways regulating NMP fate choice like Wnt signaling, can cause caudal NTDs (Garriock et al., 2015; Nowotschin et al., 2012; Takemoto et al., 2011). Evaluation of E9.5 mouse embryos with Sox2 and T, neural lineage markers Sox1 and Sox3, and mesodermal lineage makers Tbx6 and Msgn1 (Fig. S2B & C), showed no significant change due to TMEM132A loss, suggesting NMP differentiation was not disrupted in mutant embryos.

Paraxial/presomitic mesoderm (PSM) originates from and then migrates anteriorly and laterally out of caudal-lateral epiblast (CLE) (Koch et al., 2017; Steventon and Martinez Arias, 2017). The gross expression of the paraxial somite marker *Uncx4.1* and the PSM marker *Meox1* appeared normal in E9.5 *Tmem132a* mutants (Fig. 2E). However, *Meox1* positive mesoderm cells were abnormally located underneath the medial NE/NC of mutants, corresponding with the histology in Fig. 2C & D. These data indicate aberrant positioning of the paraxial mesoderm in *Tmem132a* mutant embryos.

Recent mathematical modeling and quantitative image analysis suggests that mesoderm expansion laterally is important for caudal neural tube closure (de Goederen et al., 2022). This modeling highlights extrinsic forces, including lateral expansion of the paraxial mesoderm, are sufficient for MHP formation and neural fold elevation. Figure 2 histology shows abnormal paraxial mesoderm expansion in *Tmem132a* mutants, whereas another parameter modeled of notochord adhesion to the neural plate is not disrupted. Furthermore, the modeling by de Goederen *et al.* shows that low mesoderm expansion results in exaggerated DLHPs. Indeed, at E9.5 during mode 2 closure, the mesoderm area flanking the NE is sharply decreased in mutant embryos, whereas the DLHPs are greatly exaggerated and MHP bending is severely reduced (Fig. 2F). Thus, our data provide *in vivo* evidence to support the computational modeling by de Goederen et al. (de Goederen et al., 2022) that increased mesoderm expansion is a necessary parameter in neural fold elevation and closure. We suggest that the abnormal mass of paraxial mesoderm underlying the NE forces the NE to bend in the reverse direction and/or the mesoderm is not present laterally to help to elevate the neural folds. In summary, our data indicate an important role for TMEM132A in appropriate positioning of the paraxial mesoderm.

### **TMEM132A does not regulate tissue patterning**

Based on the *Tmem132a* mutant histology, several additional possible deficits were examined. We found two other rodent models in the literature with similar histology to *Tmem132a* mutants. The first is pharmacological disruption of heparan sulphate by chlorate treatment of cultured E8.5 mouse embryos (Yip et al., 2002). Treated embryos had a flat or convex NE and accentuated DLHP bending. However, the authors noted chlorate treatment accelerates PNP closure, whereas the *Tmem132a* mutant PNP is enlarged and does not close. The second model is excess all-trans-retinoic acid (RA) treatment of E9.5 rat embryos in culture which caused NE eversion at the caudal neuropore (Seegmiller et al., 1991). In mammals, anterior-posterior patterning is controlled by the antagonistic activities of Retinoic acid (RA) versus Fibroblast Growth Factor (FGF) and Wnt signaling pathways (Gouti et al., 2015; Kumar and Duester, 2014). Comparison of wildtype and *Tmem132a* mutant E9.5 embryos showed no major changes in RNA expression of RA synthetic enzyme gene *Aldh1a2*, RA degrading-enzyme gene *Cyp26a1* and *Fgf8*, except that the most caudal epiblast expression of *Aldh1a2* is largely missing in mutants (Fig. S2D). These data suggest a different mechanism for TMEM132A function.

We examined additional tissue patterning markers to determine whether their expression was impacted in mutants. *Cdx2* transcription factor is required for axial elongation and hindgut endoderm (Chawengsaksophak et al., 2004; Savory et al., 2009; Savory et al., 2011). In *Tmem132a* mutants, *Cdx2* was present in the tail bud, with perhaps a change in the anterior

extent of expression but was significantly downregulated in the hindgut (Fig. S2D). Dorsal-ventral patterning is controlled by Sonic hedgehog (Shh), Wnt and BMP signaling in chicken and mouse embryos (Cai and Liu, 2017; Dessaud et al., 2008; Eom et al., 2011). Expression was similar between E9.5 wildtype and mutants for the roof plate marker *Msx1*, the dorsal neural fold, neural crest cell and somite marker *Pax7*, the ventral neural plate marker *Foxa2*, and the floor plate and NC marker *Shh* (Fig. S2E). *Foxa2* expression depends on high Shh signaling (Cai and Liu, 2017). The apparently normal *Foxa2* expression suggests normal Shh signaling from the NC and floor plate/MHP.

### **TMEM132A regulates cell migration**

The striking defect in paraxial mesoderm positioning led us to explore whether cell migration and cell behaviors are affected by loss of TMEM132A function. Using a scratch assay to visualize cells as they migrate into the free space, siRNA knockdown of TMEM132A in HeLa cells (Fig. 3A & B) and HEK293 cells (stably transfected with turbo GFP; Fig. S3A & B) showed a significant defect in cell migration (Fig. 3C-E & S3C, Movies 1-9 & 10-18 showing fluorescent and bright field videos collected concurrently in HeLa cells, and Movies 19-21 showing fluorescent videos in HEK 293 cells). In control siRNA experiments, the cells moved directionally to close the wound (Fig. 3E) and most cells at the wound front displayed lamellipodium (Fig. 3F, Movies 10-18). In contrast, TMEM132A knockdown caused the cells to move randomly with erratic trajectories and the cells at the wound front had significantly thinner protrusions that resembled filopodium.

Efficient generation of lamellipodia underlies directional cell motility (Zhang et al., 2012). Lamellipodia formation is regulated by cytoskeletal remodeling through the small GTPases RhoA and Rac. Downstream targets of small GTPases are the actin-severing protein Cofilin and LIM kinase, which phosphorylates Cofilin at Ser3 to inhibit its severing activity which regulates actin depolymerization. Small GTPases also initiate phosphorylation of myosin light chain 2 (MLC2) at Ser19 to control Myosin ATPase-dependent contractile activity (Lawson and Ridley, 2018). Immunoblotting analysis showed TMEM132A knockdown significantly impaired RhoA activation, and Cofilin and MLC2 phosphorylation (Fig. 3B), indicating a defect in cytoskeleton remodeling due to alterations in actomyosin polymerization.

### **TMEM132A regulates several integrins**

The WAVE regulatory complex (WRC) interacts with diverse membrane proteins such as PCDH10 containing the WRC interacting receptor sequence (WIRS) cytoplasmic motif to control actin dynamics by transmitting information from Rac GTPase to the actin nucleator Arp2/3 complex (Chen et al., 2014; Ismail et al., 2009). A conserved WIRS motif exists in the cytoplasmic domain of TMEM132A, C, D and E proteins (Sanchez-Pulido and Ponting, 2018) (Fig. S4A). The *C. elegans* homolog of the human panic disorder risk gene *TMEM132D* orchestrates neuronal morphogenesis through the WRC (Wang et al., 2021). However, endogenous WAVE1, 2 and 3 failed to be co-immunoprecipitated by overexpressed C-terminus of mouse TMEM132A. Parallel experiments using human PCDH10 positive control showed pull down of WAVE proteins, and PCDH10 interaction was abolished by mutating two conserved amino acids in the WIRS motif (Fig. S4B). This suggests that TMEM132A may not act via the WRC.

Efficient migration of a population of cells is regulated by cell-cell interactions, which are determined by tight junction and adhesion junction proteins (Friedl and Mayor, 2017). However, in TMEM132A knockdown HeLa cells, there was no obvious change in protein levels of apical tight junction protein ZO-1, or calcium-dependent adhesion junction proteins Cadherin(s), P120,  $\beta$ -Catenin,  $\alpha$ -Catenin and IQGAP1, or calcium-independent adhesion junction proteins Afadin and Nectin1 (Fig. S4C). Directional cell migration depends on cell-matrix adhesion through focal adhesions involving integrin-matrix interactions (Petrie et al., 2009; Shafaq-Zadah et al., 2016). Integrin synthesis, trafficking or stability affects cell attachment to the basement matrix, as well as downstream cytoskeletal remodeling inside cells. These extracellular and intracellular activities underlie cell behavior such as lamellipodia formation and directional migration (Nader et al., 2016; Paul et al., 2015; Shafaq-Zadah et al., 2016). Strikingly, TMEM132A knockdown in HeLa cells downregulated  $\beta$ 1 integrin, but not  $\beta$ 3 and  $\beta$ 5 integrins (Fig. 4A, B & S4C).

In mammals, heterodimerization of the 18  $\alpha$  integrin and 8  $\beta$  integrin subunits occurs within the endoplasmic reticulum (ER), leading to assembly of 24 distinct integrin receptors. Further post-translational modifications occur in the Golgi, followed by trafficking of integrin receptors to the cell surface where they perform a myriad of functions (Paul et al., 2015). Integrins are broadly categorized into RGD receptors, collagen receptors, laminin receptors and leukocyte-specific receptors (Fig. 4C). A RGD receptor of  $\alpha$ 5 $\beta$ 1 integrin mediates basal anchorage to drive epithelial zippering during mouse spinal neural tube closure (Mole et al., 2020). However, we did not observe obvious changes in protein expression of  $\alpha$ 5 or  $\alpha$ v which assemble into RGD receptors, or  $\alpha$ 3 which forms laminin receptors. Instead, there was specific downregulation of  $\alpha$ 1 and  $\alpha$ 2 integrin proteins that form the collagen receptors along with  $\beta$ 1, which was also downregulated (Fig. 4A & B). This indicates that TMEM132A functions in controlling the protein levels of collagen-binding integrin heterodimers.

Integrins and other proteins form a focal adhesion complex to establish a mechanical link between the extracellular matrix and intracellular cytoskeleton, and this is critical for cell migration. However, there was no significant change in protein levels of other focal adhesion complex components such as Talin, Paxillin, Vinculin and ACTN1 in TMEM132A knockdown cells (Fig. S4C). Phosphorylation of FAK and SRC kinases is an indication of integrin pathway activation (Nader et al., 2016). As would be predicted by the decreased levels of several integrins, TMEM132A knockdown resulted in reduction of both FAK and SRC phosphorylation (Fig. 4D). These results of decreased integrin protein levels, and reduced integrin pathway activation are consistent with disrupted cytoskeletal remodeling and cell migration observed upon loss of TMEM132A.

In summary, our studies of *Tmem132a*<sup>-/-</sup> mouse model highlight the role of TMEM132A in regulating mesoderm migration, which contributes to neural fold elevation and successful caudal neural tube closure. Loss of TMEM132A disrupts migration of paraxial mesodermal cells in the caudal trunk region. Our data suggests that lack of TMEM132A function in the mesoderm is the predominant cause of caudal NTD but tissue-specific knock-out experiments are needed to confirm a specific role in the paraxial mesoderm. TMEM132A regulates the level of integrin proteins that preferentially bind collagen. This serves to activate the integrin signaling pathway to regulate actomyosin polymerization and cytoskeletal remodeling, which



is required for lamellipodium formation, cell motility and PSM migration during mammalian caudal neural tube closure.

## Experimental procedures

### Mouse model

*Tmem132a*<sup>tm1b(KOMP)Wtsi</sup> mice (Colony *Tmem132a* EPD0111\_5\_B06 in C57BL/6N genetic background) was generated by Baylor College of Medicine and obtained from the Knockout Mouse Project (KOMP). All animals were handled according to the protocol granted by the Institutional Animal Care and Use Committee (IACUC) at the University of Colorado Boulder.

Phenotypic analysis of embryos was either performed by us or by microCT (Fig. S1A) by Baylor College of Medicine at indicated embryonic stages. 3D reconstructions of microCT data are available through <https://www.mousephenotype.org/embryoviewer/?mqi=MGI:2147810>. DNA isolated from the embryonic yolk sac was used for genotyping with primers targeting wild type allele (W1 F/R: 5'-CCGATCCCTGACTCTCCAAC-3'/5'-ATGCTCAGGGGCATCTAGGA-3'; W2 F/R: 5'-AATCCCACCTTCCCAGACCT-3'/5'-AGCCCTCTCCTAGGGCAATC-3'), mutant allele (M1 F/R: 5'-TGCTGCATGGACCTATTTGG-3'/5'-GGGAAAGGGTTCGAAGTTCC-3'; M2 F/R: 5'-TCTGGATCCGGAATAACTTCG-3'/5'-ACGGCTCTTCCAGTGGGTA-3'), and *Prdm14* as Internal control (Int. Ctrl F/R: 5'-CTAGGCCACAGAATTGAAAGATCT-3'/5'-GTAGGTGGAAATTCTAGCATCATCC-3').

Folic acid (FA) supplementation experiment was performed as previously described (Marean et al., 2011). Briefly, males and females were bred and maintained on two diets that only differ in the concentration of FA (2 p.p.m. for the control FA diet or 10 p.p.m. for the high FA diet) and F1 and F2 animals were kept on diet. The F2 heterozygous males and females from the same diet were timed-mated (with noon of the day a seminal plug was detected considered as embryonic day 0.5 (E0.5)). F3 embryos were dissected at E10.5 and scored for phenotype and genotype.

### Histology of mouse embryos

Timed-mated pregnant female mice were euthanized, and embryos dissected in PBS at various stages, the number of somites counted, and yolk sac used for genotyping. For all wildtype to mutant comparisons, we used somite-matched embryos (2 somite or less difference). For cryo-sectioning, embryos were cryoprotected in 30% sucrose (in PBS) overnight at 4°C, then rinsed sequentially in 2:1, 1:1 and 1:2 (v/v) of 30% sucrose:O.C.T (Tissue-Tek), embedded in O.C.T, sealed and stored at -80°C until use. 12 µm cryosections were cut on a Leica CM3050 S RESEARCH CRYOSTAT and mounted on Fisherbrand Superfrost Plus Microscope Slides and stored at -80°C prior to use.

For whole-mount β-galactosidase staining, embryos were fixed at room temperature in Fix solution (2% formaldehyde, 0.2% glutaraldehyde in PBS) for 15 min, 30 min or 60 min for embryos at E8.5, 9.5 or 10.5, respectively. After a wash and 30 min incubation in PBS, embryos were transferred into Staining solution (PBS with 5 mM Potassium ferrocyanide, 5 mM Potassium ferricyanide, 2 mM Magnesium chloride, and 1 mg/ml 5-bromo-4-chloro-3-indolyl-β-D-galactopyranoside (X-gal) in Dimethylformamide (DMF)) overnight in the dark at

room temperature with gentle agitation. Embryos were rinsed quickly and then incubated for 30 min in PBS, and fixed again overnight, then photographed.

Whole-mount *In situ* hybridization (WISH) was performed according to published protocols (Biris and Yamaguchi, 2014). Mouse riboprobe constructs for *Uncx4.1* (Sall-T7) was kindly provided by Dr. Terry Yamaguchi (Chalamalasetty et al., 2014) and *Msgn1* (XbaI-Sp6) was a gift from Dr. Olivier Pourquié (Chal et al., 2015). *Sox2* (AccI-T3), *Brachyury* (T) (BamHI-T7), *Tbx6* (HindIII-T3), *Fgf8* (PstI-T7) *Msx1*(BamHI-T7), *Foxa2* (BamHI-T3) and *Shh* (HindIII-T3) are Niswander lab mouse ISH stock #53, #25, #27, #10, #133, #42 and #41, respectively. The following mouse riboprobes were amplified by the following primer pairs and subcloned into pCR-Blunt II-TOPO (ThermoFisher #450245). *Meox1* (EcoRV-Sp6) 646 bp amplicon generated by primer pair 5'-TGTGGGAGCCTTGAATTTCC-3'/5'-

CACAGGGGTCTCTCCAAGG-3. *Tmem132a* (EcoRV-Sp6) 336 bp amplicon with primer pair 5'-CGCTCAGACACCAGGATCT-3'/5'-TGCGAGCCTTCTTACTCTGC-3'. *Sox1* (EcoRV-Sp6) 549 bp amplicon with primer pair 5'-TGTATGACTGCCGGCTCTGT-3'/5'-ACTCTTGGGCCCTGCAGATA-3'. *Sox3* (SpeI-T7) 468 bp amplicon with primer pair 5'-AGCGGAAATGGGACTTGCTA-3'/5'-AAATAACCCCTTCCCCACCA-3'. *Aldh1a2* (SpeI-T7) 439 bp amplicon with primer pair 5'-CCCCTTGTCCATTCACCACT-3'/5'-TGGGTGCACTGTAGGAGGAA-3. *Cyp26a1* (SpeI-T7) 526 bp amplicon with primer pair 5'-AGTAACCTGGGCGGCCTTAT-3'/5'-GGCTGAAGGCCTGCATAATC-3'. *Cdx2* (SpeI-T7) 644 bp amplicon with primer pair 5'-TCCTCTCCTCCTACCCACGA-3'/5'-GGGACAGGAAGTCCAGGTTG-3'. *Pax7* (SpeI-T7) 555 bp amplicon with primer pair 5'-TGGATCACCTCATCCAGTG-3'/5'-TGTGGAGGAGGATGCATTTG-3'.

Hematoxylin and Eosin (H&E) staining protocol was performed on cryosections according to procedure posted on IHCWORLD website ([https://www.ihcworld.com/protocols/special\\_stains/h&e\\_ellis.htm](https://www.ihcworld.com/protocols/special_stains/h&e_ellis.htm)). Sections were then mounted and stored at 4°C prior to imaging.

Whole mount imaging was performed on Nikon SMZ18 stereomicroscope. Section images were captured on Nikon TiU wide field with color bright field camera under 10x 0.45NA Plan Apo DIC N1 WD 4 (mm) objective. Images were processed and analyzed using Fiji (NIH) software (Schindelin et al., 2012).

### Cell Culture and Transfection

HEK 293 cells (ATCC, #CRL-1573) stably transfected with pSCDTG(P) expressing turbo GFP (Li and Niswander, 2020), HEK 293T cells (American Type Culture Collection (ATCC), #CRL-3216) and HeLa cells (ATCC, #CCL-2) were cultured in high-glucose Dulbecco's Modified Eagle Medium (DMEM, Thermo Fisher Scientific, #11995065) supplemented with 10% FBS (Thermo Fisher Scientific, #A3840101) at 37°C with 5% CO<sub>2</sub>.

Cells were seeded and maintained to reach approximately 50% confluency at the time of transfection. PEI MAX 40K (Polysciences, #24765-1, 3-5 µg per µg plasmid) or Lipofectamine 3000 Transfection Reagent (Thermo Fisher Scientific, #L3000015, 3 µl per µg plasmid) was used for plasmid transfection. Lipofectamine RNAiMAX Reagent (Thermo Fisher Scientific, #13778-150, 3 µl per 10 pmol siRNA) was used for siRNA transfection, following manufacturer's protocol. The following Silencer Select siRNAs from Thermo Fisher Scientific



were used at 10 mM final concentration: Negative control No. 1 siRNA (siCtrl, #4390843), human TMEM132A No.1 siRNA (siT132A #1, #s29890) and human TMEM132A No. 2 siRNA (siT132A #2, #s29892).

### **Real-Time Quantitative PCR**

Total RNA was extracted from cultured cells 48 hours post siRNA transfection using TRIzol Reagent (Thermo Fisher Scientific, #15596018), and cDNA generated by reverse transcription using SuperScript IV First-Strand Synthesis System (Thermo Fisher Scientific, #18091050) according to the manufacturer's instruction. Real-time quantitative PCR was performed on a Roche LC480 thermocycler using Luna Universal Probe qPCR Master Mix (NEB, #M3004X). Relative fold change in gene expression was calculated as described previously (Li et al., 2013a; Li et al., 2013b). Primers and Universal Probe Library (UPL, Roche Diagnostics): Human TMEM132A F/R (+ UPL #1): 5'-CCCTGGACGTCGTGAGAG-3'/5'-GAAGTGTTCAGGGCGTCTA-3', Human GAPDH F/R (+ UPL #45): 5'-TCCACTGGCGTCTTCACC-3'/5'-GGCAGAGATGATGACCCTTTT-3'.

### **Cell lysis, Immunoprecipitation (IP) and immunoblotting assay**

Media was removed from cultures and cells washed once in PBS. Cytoplasmic proteins were extracted for IP/co-IP experiments using n-Dodecyl-beta-Maltoside Detergent (DDM, Thermo Fisher Scientific, #89903) or NP-40 lysis buffer (50 mM Tris-HCl pH 8.0, 150 mM NaCl, 10% Glycerol (v/v), 1 mM EDTA, 1% DDM or 0.5% NP-40 (v/v)), supplemented with proteinase and phosphatase inhibitor cocktail (1 µg/ml Aprotinin, 1 µg/ml Leupeptin, 1 µg/ml Pepstatin, 1 mM Na<sub>3</sub>VO<sub>4</sub>, 10 mM NaF) and 10 u/ml Benzonase Nuclease (MilliporeSigma, #E1040). Lysate was clarified by centrifugation to remove insoluble precipitates and protein concentration was measured by Pierce BCA Protein Assay Kit (Thermo Fisher Scientific, #23225). Anti-Flag M2 Magnetic Beads (MilliporeSigma, #M8823) was used for IP/co-IP experiment. Beads were then washed three times using lysis buffer and boiled at 70°C for 10 min in LDS Sample Buffer (Thermo Fisher Scientific, #84788) supplemented with 50 mM DTT.

For whole cell lysis, RIPA buffer (50 mM Tris-HCl pH 8.0, 150 mM NaCl, 10% Glycerol (v/v), 1 mM EDTA, 1% NP-40 (v/v), 0.5% Sodium deoxycholate (w/v), 0.1% Sodium dodecyl sulfate (SDS) (v/v)), supplemented with proteinase and phosphatase inhibitor cocktail and 10 u/ml Benzonase Nuclease) was used. Lysate was clarified by centrifugation, supernatant collected, and protein concentration was measured by BCA assay. Whole cell lysate was then denatured by the addition of LDS sample buffer supplemented with 50 mM DTT, followed by boiling at 70°C for 10 min.

Generally, 15-30 µg of each lysate was loaded onto 4–12% NuPAGE Bis-Tris gels (Thermo Fisher Scientific, #NP0321BOX), followed by SDS-PAGE with NuPAGE MOPS SDS Running Buffer buffer (Thermo Fisher Scientific, NP0001) or MES SDS running buffer (Thermo Fisher Scientific, #NP0002) supplemented with NuPAGE Antioxidant (Thermo Fisher Scientific, #NP0005). The proteins were electro-transferred to immobilon-FL PVDF, 0.45 µm (MilliporeSigma, #IPFL85R) or Nitrocellulose Membrane, 0.2 µm (Bio-Rad, #1620112) and subjected to immunoblotting assay with the following antibodies against: TMEM132A (Proteintech, #25301-1-AP), GAPDH (MilliporeSigma, #G9545), RhoA (provided in Rho Activation Assay Biochem Kit), Cofilin (CST, #5175S), phospho-Cofilin (S3) (CST, #3313S),

MLC2 (CST, #8505S), phosphor-MLC2 (S19) (CST, #3671S), ZO-1 (Thermo Fisher Scientific, #61-7300), pan-Cadherin (CST, 4068S), P120 (BD, #610133),  $\beta$ -Catenin (ZYMED, #18-0266),  $\alpha$ -Catenin (CST, #3236S), IQGAP1 (CST, #2901S), Afadin (R&D, MAB78921), Nectin1 (Thermo Fisher Scientific, #37-5900), ITGB1 (BD, #610467), ITGB3 (CST, #13166T), ITGB5 (CST, #3629T), ITGA1a (Proteintech, #29042-1-AP), ITGA2 (Thermo Fisher Scientific, #14-0498-80), ITGA3 (Proteintech, #66070-1-Ig), ITGA5 (CST, #4705T), ITGA $\nu$  (CST, 4711T), Talin (CST, 9021S), Paxillin (CST, #12065S), Vinculin (MilliporeSigma, #V9131), ACTN1 (CST, #6487S), FAK (CST, #3285S), phosphor-FAK (Y397) (CST, 3283S), SRC (CST, #2109S), phosphor-SRC (Y416) (CST, 2101S), WAVE1 (MilliporeSigma, #MABN503), WAVE2 (CST, #3659T), WAVE3 (CST, #2806) and Flag (MilliporeSigma, #F1804). Goat anti-Mouse or Rabbit IgG (H+L) Highly Cross-Adsorbed Secondary Antibody, HRP (Thermo Fisher Scientific, #A16078 or A16110) was used. Immunoblot signal was developed with SuperSignal West Pico Chemiluminescent or Femto Maximum Sensitivity Substrate (Thermo Fisher Scientific, #34578 or 34096) and captured on BIO-RAD ChemiDoc MP Imaging system and quantification was calculated by measuring band grayscale using Fiji (NIH) software (Schindelin et al., 2012).

### **Wound healing assay**

HEK 293 cells stably expressing turbo GFP or HeLa cells were transfected with control or TMEM132A-specific siRNAs at approximately 50% confluency. 48 hours later, cells were trypsinized, counted, and approximately  $0.44 \times 10^6$  cells were seeded into each well of Culture-Insert 2 Well (Ibidi, # 80209) mounted on 35 mm glass-bottom dish (cell culture treated, Collagen1 coated for HEK 293 cells to increase the attachment). The following day when cells reached to full confluency and appropriate attachment, inserts were removed to create a cell-free gap of approximately 500  $\mu$ m. Time-lapse live cell images spanning 36 hours with 10 minutes intervals were captured on Yokogawa & Olympus CellVoyager CV1000 confocal scanner under 10x 0.4NA UPLSAPO WD 3.1 (mm) objective. To visualize nuclei of HeLa cells, SPY505-DNA (Cytoskeleton, #CY-SC101) was added to the medium at recommended concentration 6 hours prior to insert removal. Cell images were captured by phase contrast using bright field or by Z-stack (10 slices) maximum projection using the green fluorescence channel (emission filter: 500-550 nm).

Movies of image stacks were processed using CV1000 confocal scanner operating software. All wound healing assay analysis was performed in Fiji (NIH) software (Schindelin et al., 2012). To calculate wound area over time, the brightness was adjusted to make every cell clearly visible. For HeLa cells, the videos were bandpass filtered to remove floating cells from the middle of the wound area. For HEK293 cells, each image was made into a binary and the binary image was dilated to close gaps between cells not in the wound area. The wound area was then defined in each video by calculating the "Measure Stack" function.

Cell tracking analysis was performed using the TrackMate macro (version 7.5.0) (<https://www.biorxiv.org/content/10.1101/2021.09.03.458852v1>) in Fiji. For all analyses, cells were detected using a Laplacian of a gaussian (LoG) detector. For HeLa cell analysis, the estimated object diameter was set to 25 px and threshold was set to 1. For 293T cell analysis, the estimated object diameter was set to 35 px and threshold was set to 0.1. Tracks were

created using the LAP tracker. For HeLa cells, the maximum linking distance and track segment gap closing were set to 15 px, with a maximum frame gap of 2. For analysis, tracks analyzed were limited to those where the cell could be tracked for more than 103/207 video frames.

### **GTPase activity assay**

HeLa cells were transfected with 140 pmol (approximately 10 mM final concentration) control or TMEM132A-specific siRNAs at approximately 50% confluency in 10 cm dishes. 48 hours post transfection, cells were trypsinized, counted, and re-plated into Rectangular Cell Culture Plates provided in Cell Comb Scratch Assay kit (MilliporeSigma, #17-10191) at approximately 50% confluency. The following day when cells reached full confluency and appropriate attachment, scratches were evenly applied extensively to the mono-cell layer using the combs provided in the kit. Detached cell debris was removed by replacing the medium. Cells were cultured further for 12 hours to initiate migration into free space and then subjected to RhoA activity assay using Rho Activation Assay Biochem Kit (Cytoskeleton, #BK036) according to manufacturer's instruction. Briefly, cells were lysed in 1 ml lysis buffer per plate provided in kit and clarified by centrifugation. A small amount of supernatant was used for protein concentration determination by Pierce BCA Protein Assay Kit, and the rest was flash frozen and stored at -80°C prior to use. An equal amount of lysate was subjected to 50 µg amino acids 7-89 of rhotekin Rho binding domain (RBD) coupled beads and incubated at 4°C on a rotator for 1 hour to enrich the active form of RhoA (GTP-bound state). Beads were then washed once and boiled at 70°C for 10 min in LDS Sample Buffer supplemented with 50 mM DTT. Total RhoA protein level in cell lysate serves as internal control.

### **Data collection and statistical analysis**

All experiments were performed at least twice, and representative results are shown. For Real-Time Quantitative PCR at least three biological replicates were performed. Data are presented as the mean  $\pm$  S.D. p-value was calculated by Fisher's exact test or Student's t-test as needed and considered significant when less than 0.05.

### **Data availability statement**

The original contributions presented in the study are included in the article/Supplementary Material, further inquiries can be directed to the corresponding author.

### **Ethics statement**

The animal study was reviewed and approved by Institutional Animal Care and Use Committee (IACUC) at the University of Colorado Boulder.

### **Author contribution**

BL and LN designed the project. BL and JD performed the experiments. BL and LB performed the quantitative image analysis, BL and LN prepared the manuscript.

## Acknowledgement

We are grateful to Lori Bulwith for her continuous support in mouse husbandry. We thank the Molecular, Cellular and Developmental Biology (MCDB) Light Microscopy Core Facility (LMCF) at University of Colorado Boulder and Dr. James Orth and Joaquin Quintana for their help and advice with microscopy.

## Funding

This work was supported by NIH R01-HD081562 and P01-HD104436.

## Disclosure statement

The authors declare no conflict of interests.

## Reference

- Biris, K.K., Yamaguchi, T.P., 2014. Two-color in situ hybridization of whole-mount mouse embryos. *Methods Mol Biol* 1092, 17-30.
- Cai, H., Liu, A., 2017. Spop regulates Gli3 activity and Shh signaling in dorsoventral patterning of the mouse spinal cord. *Dev Biol* 432, 72-85.
- Chal, J., Oginuma, M., Al Tanoury, Z., Gobert, B., Sumara, O., Hick, A., Bousson, F., Zidouni, Y., Mursch, C., Moncuquet, P., Tassy, O., Vincent, S., Miyanari, A., Bera, A., Garnier, J.M., Guevara, G., Hestin, M., Kennedy, L., Hayashi, S., Drayton, B., Cherrier, T., Gayraud-Morel, B., Gussoni, E., Relaix, F., Tajbakhsh, S., Pourquie, O., 2015. Differentiation of pluripotent stem cells to muscle fiber to model Duchenne muscular dystrophy. *Nat Biotechnol* 33, 962-969.
- Chalamalasetty, R.B., Garriock, R.J., Dunty, W.C., Jr., Kennedy, M.W., Jailwala, P., Si, H., Yamaguchi, T.P., 2014. Mesogenin 1 is a master regulator of paraxial presomitic mesoderm differentiation. *Development* 141, 4285-4297.
- Chawengsaksophak, K., de Graaff, W., Rossant, J., Deschamps, J., Beck, F., 2004. Cdx2 is essential for axial elongation in mouse development. *Proc Natl Acad Sci U S A* 101, 7641-7645.
- Chen, B., Brinkmann, K., Chen, Z., Pak, C.W., Liao, Y., Shi, S., Henry, L., Grishin, N.V., Bogdan, S., Rosen, M.K., 2014. The WAVE regulatory complex links diverse receptors to the actin cytoskeleton. *Cell* 156, 195-207.
- de Goederen, V., Vetter, R., McDole, K., Iber, D., 2022. Hinge point emergence in mammalian spinal neurulation. *Proc Natl Acad Sci U S A* 119, e2117075119.
- Dessaud, E., McMahon, A.P., Briscoe, J., 2008. Pattern formation in the vertebrate neural tube: a sonic hedgehog morphogen-regulated transcriptional network. *Development* 135, 2489-2503.
- Eom, D.S., Amarnath, S., Fogel, J.L., Agarwala, S., 2011. Bone morphogenetic proteins regulate neural tube closure by interacting with the apicobasal polarity pathway. *Development* 138, 3179-3188.

Erhardt, A., Akula, N., Schumacher, J., Czamara, D., Karbalai, N., Muller-Myhsok, B., Mors, O., Borglum, A., Kristensen, A.S., Woldbye, D.P., Koefoed, P., Eriksson, E., Maron, E., Metspalu, A., Nurnberger, J., Philibert, R.A., Kennedy, J., Domschke, K., Reif, A., Deckert, J., Otowa, T., Kawamura, Y., Kaiya, H., Okazaki, Y., Tani, H., Tokunaga, K., Sasaki, T., Ioannidis, J.P., McMahon, F.J., Binder, E.B., 2012. Replication and meta-analysis of TMEM132D gene variants in panic disorder. *Transl Psychiatry* 2, e156.

Farlow, J.L., Lin, H., Sauerbeck, L., Lai, D., Koller, D.L., Pugh, E., Hetrick, K., Ling, H., Kleinloog, R., van der Vlies, P., Deelen, P., Swertz, M.A., Verweij, B.H., Regli, L., Rinkel, G.J., Ruigrok, Y.M., Doheny, K., Liu, Y., Broderick, J., Foroud, T., Investigators, F.I.A.S., 2015. Lessons learned from whole exome sequencing in multiplex families affected by a complex genetic disorder, intracranial aneurysm. *PLoS One* 10, e0121104.

Friedl, P., Mayor, R., 2017. Tuning Collective Cell Migration by Cell-Cell Junction Regulation. *Cold Spring Harb Perspect Biol* 9.

Garriock, R.J., Chalamalasetty, R.B., Kennedy, M.W., Canizales, L.C., Lewandoski, M., Yamaguchi, T.P., 2015. Lineage tracing of neuromesodermal progenitors reveals novel Wnt-dependent roles in trunk progenitor cell maintenance and differentiation. *Development* 142, 1628-1638.

Gouti, M., Delile, J., Stamataki, D., Wymeersch, F.J., Huang, Y., Kleinjung, J., Wilson, V., Briscoe, J., 2017. A Gene Regulatory Network Balances Neural and Mesoderm Specification during Vertebrate Trunk Development. *Dev Cell* 41, 243-261 e247.

Gouti, M., Metzis, V., Briscoe, J., 2015. The route to spinal cord cell types: a tale of signals and switches. *Trends Genet* 31, 282-289.

Gouti, M., Tsakiridis, A., Wymeersch, F.J., Huang, Y., Kleinjung, J., Wilson, V., Briscoe, J., 2014. In vitro generation of neuromesodermal progenitors reveals distinct roles for wnt signalling in the specification of spinal cord and paraxial mesoderm identity. *PLoS Biol* 12, e1001937.

Greene, N.D., Copp, A.J., 2014. Neural tube defects. *Annu Rev Neurosci* 37, 221-242.

Haaker, J., Lonsdorf, T.B., Raczka, K.A., Mechias, M.L., Gartmann, N., Kalisch, R., 2014. Higher anxiety and larger amygdala volumes in carriers of a TMEM132D risk variant for panic disorder. *Transl Psychiatry* 4, e357.

Henrique, D., Abranches, E., Verrier, L., Storey, K.G., 2015. Neuromesodermal progenitors and the making of the spinal cord. *Development* 142, 2864-2875.

Ismail, A.M., Padrick, S.B., Chen, B., Umetani, J., Rosen, M.K., 2009. The WAVE regulatory complex is inhibited. *Nat Struct Mol Biol* 16, 561-563.

Koch, F., Scholze, M., Wittler, L., Schifferl, D., Sudheer, S., Grote, P., Timmermann, B., Macura, K., Herrmann, B.G., 2017. Antagonistic Activities of Sox2 and Brachyury Control the Fate Choice of Neuro-Mesodermal Progenitors. *Dev Cell* 42, 514-526 e517.

Kumar, S., Duester, G., 2014. Retinoic acid controls body axis extension by directly repressing Fgf8 transcription. *Development* 141, 2972-2977.

Lane, J.M., Liang, J., Vlasac, I., Anderson, S.G., Bechtold, D.A., Bowden, J., Emsley, R., Gill, S., Little, M.A., Luik, A.I., Loudon, A., Scheer, F.A., Purcell, S.M., Kyle, S.D., Lawlor, D.A., Zhu, X., Redline, S., Ray, D.W., Rutter, M.K., Saxena, R., 2017. Genome-wide association analyses of sleep disturbance traits identify new loci and highlight shared genetics with neuropsychiatric and metabolic traits. *Nat Genet* 49, 274-281.

Lawson, C.D., Ridley, A.J., 2018. Rho GTPase signaling complexes in cell migration and invasion. *J Cell Biol* 217, 447-457.

Li, B., Li, S., Yin, J., Zhong, J., 2013a. Identification and characterization of the *Spodoptera* Su(var) 3-9 histone H3K9 trimethyltransferase and its effect in AcMNPV infection. *PLoS One* 8, e69442.

Li, B., Niswander, L.A., 2020. TMEM132A, a Novel Wnt Signaling Pathway Regulator Through Wntless (WLS) Interaction. *Front Cell Dev Biol* 8, 599890.

Li, B., Yu, C., Yin, J., Zhong, J., 2013b. Enhanced transgene expression in mammalian cells by recombinant baculovirus vector containing bovine papillomavirus type 1 replication elements. *J Gene Med* 15, 282-290.

Li, J., Zhao, X., Xin, Q., Shan, S., Jiang, B., Jin, Y., Yuan, H., Dai, P., Xiao, R., Zhang, Q., Xiao, J., Shao, C., Gong, Y., Liu, Q., 2015. Whole-exome sequencing identifies a variant in TMEM132E causing autosomal-recessive nonsyndromic hearing loss DFNB99. *Hum Mutat* 36, 98-105.

Liaqat, K., Hussain, S., Bilal, M., Nasir, A., Acharya, A., Ali, R.H., Nawaz, S., Umair, M., Schrauwen, I., Ahmad, W., Leal, S.M., 2020. Further evidence of involvement of TMEM132E in autosomal recessive nonsyndromic hearing impairment. *J Hum Genet* 65, 187-192.

Marean, A., Graf, A., Zhang, Y., Niswander, L., 2011. Folic acid supplementation can adversely affect murine neural tube closure and embryonic survival. *Hum Mol Genet* 20, 3678-3683.

Mole, M.A., Galea, G.L., Rolo, A., Weberling, A., Nychyk, O., De Castro, S.C., Savery, D., Fassler, R., Ybot-Gonzalez, P., Greene, N.D.E., Copp, A.J., 2020. Integrin-Mediated Focal Anchorage Drives Epithelial Zippering during Mouse Neural Tube Closure. *Dev Cell* 52, 321-334 e326.

Nader, G.P., Ezratty, E.J., Gundersen, G.G., 2016. FAK, talin and PIPK $\gamma$  regulate endocytosed integrin activation to polarize focal adhesion assembly. *Nat Cell Biol* 18, 491-503.

Nowotschin, S., Ferrer-Vaquer, A., Concepcion, D., Papaioannou, V.E., Hadjantonakis, A.K., 2012. Interaction of Wnt3a, Msn1 and Tbx6 in neural versus paraxial mesoderm lineage commitment and paraxial mesoderm differentiation in the mouse embryo. *Dev Biol* 367, 1-14.

Oh-hashii, K., Imai, K., Koga, H., Hirata, Y., Kiuchi, K., 2010. Knockdown of transmembrane protein 132A by RNA interference facilitates serum starvation-induced cell death in Neuro2a cells. *Mol Cell Biochem* 342, 117-123.

Oh-hashii, K., Naruse, Y., Amaya, F., Shimosato, G., Tanaka, M., 2003. Cloning and characterization of a novel GRP78-binding protein in the rat brain. *J Biol Chem* 278, 10531-10537.

Paul, N.R., Jacquemet, G., Caswell, P.T., 2015. Endocytic Trafficking of Integrins in Cell Migration. *Curr Biol* 25, R1092-1105.

Petrie, R.J., Doyle, A.D., Yamada, K.M., 2009. Random versus directionally persistent cell migration. *Nat Rev Mol Cell Biol* 10, 538-549.

Quast, C., Altmann, A., Weber, P., Arloth, J., Bader, D., Heck, A., Pfister, H., Muller-Myhsok, B., Erhardt, A., Binder, E.B., 2012. Rare variants in TMEM132D in a case-control sample for panic disorder. *Am J Med Genet B Neuropsychiatr Genet* 159B, 896-907.

Rodrigo Albors, A., Storey, K.G., 2016. Mapping body-building potential. *Elife* 5, e14830.



Sanchez-Pulido, L., Ponting, C.P., 2018. TMEM132: an ancient architecture of cohesin and immunoglobulin domains define a new family of neural adhesion molecules. *Bioinformatics* 34, 721-724.

Savory, J.G., Bouchard, N., Pierre, V., Rijli, F.M., De Repentigny, Y., Kothary, R., Lohnes, D., 2009. Cdx2 regulation of posterior development through non-Hox targets. *Development* 136, 4099-4110.

Savory, J.G., Mansfield, M., Rijli, F.M., Lohnes, D., 2011. Cdx mediates neural tube closure through transcriptional regulation of the planar cell polarity gene Ptk7. *Development* 138, 1361-1370.

Schindelin, J., Arganda-Carreras, I., Frise, E., Kaynig, V., Longair, M., Pietzsch, T., Preibisch, S., Rueden, C., Saalfeld, S., Schmid, B., Tinevez, J.Y., White, D.J., Hartenstein, V., Eliceiri, K., Tomancak, P., Cardona, A., 2012. Fiji: an open-source platform for biological-image analysis. *Nat Methods* 9, 676-682.

Seegmiller, R.E., Harris, C., Luchtel, D.L., Juchau, M.R., 1991. Morphological differences elicited by two weak acids, retinoic and valproic, in rat embryos grown in vitro. *Teratology* 43, 133-150.

Shafaq-Zadah, M., Gomes-Santos, C.S., Bardin, S., Maiuri, P., Maurin, M., Iranzo, J., Gautreau, A., Lamaze, C., Caswell, P., Goud, B., Johannes, L., 2016. Persistent cell migration and adhesion rely on retrograde transport of beta(1) integrin. *Nat Cell Biol* 18, 54-64.

Shimada-Sugimoto, M., Otowa, T., Miyagawa, T., Khor, S.S., Omae, Y., Toyo-Oka, L., Sugaya, N., Kawamura, Y., Umekage, T., Miyashita, A., Kuwano, R., Kaiya, H., Kasai, K., Tanii, H., Okazaki, Y., Tokunaga, K., Sasaki, T., 2016. Polymorphisms in the TMEM132D region are associated with panic disorder in HLA-DRB1\*13:02-negative individuals of a Japanese population. *Hum Genome Var* 3, 16001.

Steventon, B., Martinez Arias, A., 2017. Evo-engineering and the cellular and molecular origins of the vertebrate spinal cord. *Dev Biol* 432, 3-13.

Takemoto, T., Uchikawa, M., Yoshida, M., Bell, D.M., Lovell-Badge, R., Papaioannou, V.E., Kondoh, H., 2011. Tbx6-dependent Sox2 regulation determines neural or mesodermal fate in axial stem cells. *Nature* 470, 394-398.

Wald, N.J., Morris, J.K., Blakemore, C., 2018. Public health failure in the prevention of neural tube defects: time to abandon the tolerable upper intake level of folate. *Public Health Rev* 39, 2.

Wang, X., Jiang, W., Luo, S., Yang, X., Wang, C., Wang, B., Dang, Y., Shen, Y., Ma, D.K., 2021. The *C. elegans* homolog of human panic-disorder risk gene TMEM132D orchestrates neuronal morphogenesis through the WAVE-regulatory complex. *Mol Brain* 14, 54.

Wilde, J.J., Petersen, J.R., Niswander, L., 2014. Genetic, epigenetic, and environmental contributions to neural tube closure. *Annu Rev Genet* 48, 583-611.

Yip, G.W., Ferretti, P., Copp, A.J., 2002. Heparan sulphate proteoglycans and spinal neurulation in the mouse embryo. *Development* 129, 2109-2119.

Zhang, Y., Kim, T.H., Niswander, L., 2012. Phactr4 regulates directional migration of enteric neural crest through PP1, integrin signaling, and cofilin activity. *Genes Dev* 26, 69-81.

## Figures

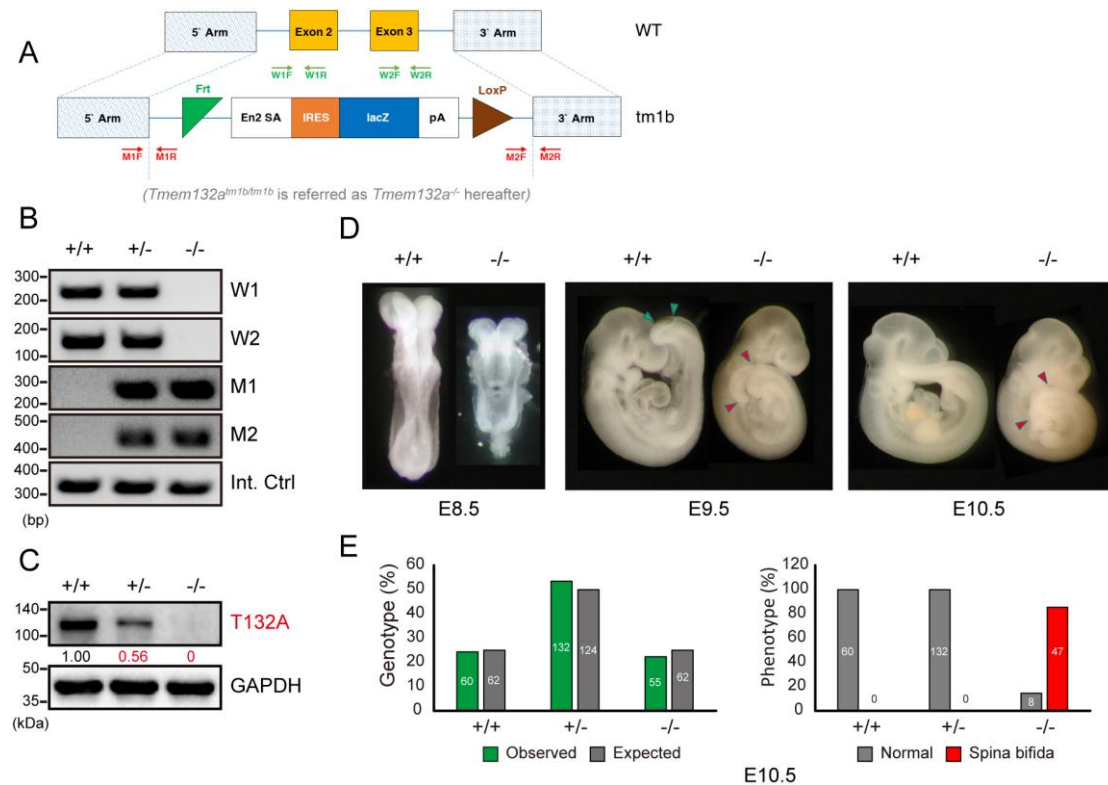

**Fig. 1. *Tmem132a* deletion causes embryonic lethality and spina bifida.** (A) Schematic of wildtype (WT) and *Tmem132a*<sup>tm1b(KOMP)Wtsi</sup> mutant allele. (B) Genotyping with primers targeting either wildtype or substituted regions as shown in (A), and with *Prdm14* primers as internal control. (C) TMEM132A protein expression in wildtype, heterozygous or homozygous mutant embryos with relative band intensity normalized to GAPDH internal control listed below. (D) Representative whole mount images of E8.5, E9.5 and E10.5 wildtype and mutant embryos. Green arrows mark posterior neuropore (PNP) in wildtype while red arrows indicate enlarged PNP in mutants. (E) All genotypes are observed at expected frequency but ~85% of homozygous mutant embryos exhibit spina bifida at E10.5. Numbers of embryos examined are shown in each column.

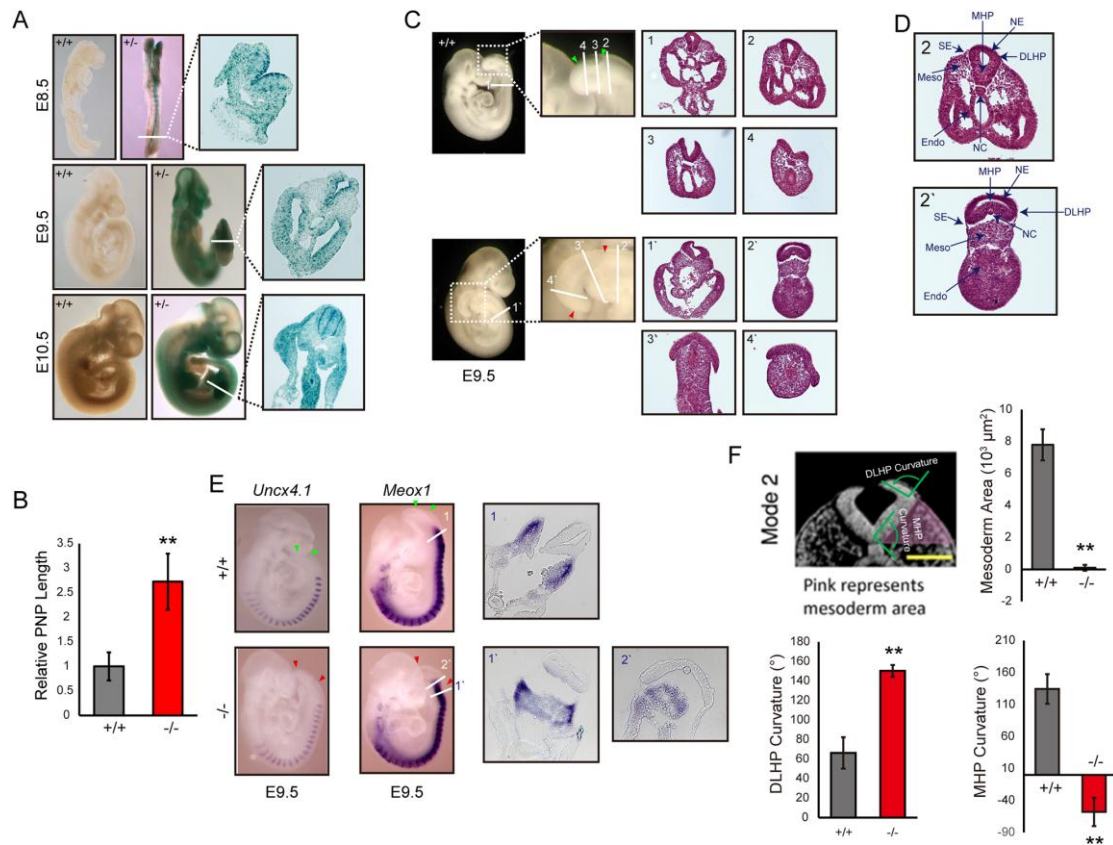

**Fig. 2. TMEM132A deficiency leads to defective lateral migration of caudal mesoderm.** (A) Whole-mount  $\beta$ -galactosidase staining of *Tmem132a* expression during neural tube closure from E8.5 to E10.5. (B) Mutant embryos have an elongated PNP at E9.5 (22 to 24 somites; n=4). (C) Mutant embryos have convex everted neuroepithelium (NE) by bright field and by Hematoxylin and Eosin (H&E) staining of transverse sections around the neuropore (sections in panels 1-4 refer to whole-mount picture). (D) H&E staining shows all tissue types in mutants, but NE shows reverse bending at the medial hinge point (MHP)/notochord (NC), exaggerated dorsolateral hinge points (DLHP) and abnormal positioning of mesoderm near the midline. (E) Paraxial somite marker *Uncx4.1* and presomitic mesoderm marker *Meox1* expression is grossly normal but transverse sections highlights the abnormal mesoderm mass that is *Meox1* positive. (F) Schematic diagram (adapted from (de Goederen et al., 2022)) indicating measurements to quantify mesoderm area flanking NE and curvatures of the DLHP and MHP (n=3 for WT and mutant).

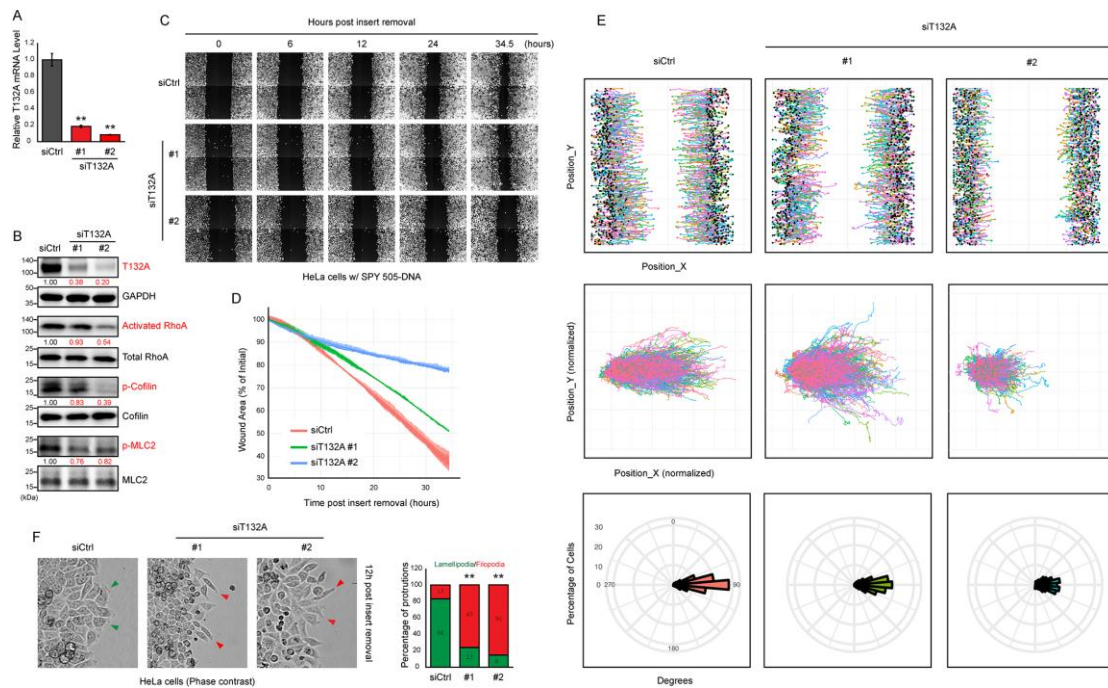

**Fig. 3. TMEM132A regulates cell migration in wound healing assay in HeLa cells. (A)** Knockdown of *Tmem132A* in HeLa cells by siRNAs #1 and #2 relative to negative control siRNA, assayed 48 hours post transfection by RT qPCR with GAPDH as internal control ( $n \geq 3$ , Student's *t*-test,  $**p \leq 0.01$ ). **(B)** Immunoblotting assay demonstrates successful knockdown of TMEM132A (48 hours post siRNA transfection), repression of RhoA activation, and reduced phosphorylation of Cofilin and MLC2. Relative band intensity given below each corresponding panel (TMEM132A normalized to GAPDH; activated RhoA and phosphorylated proteins normalized to corresponding total protein). Relative protein levels <0.80 shown in red. **(C)** Wound healing assay in HeLa cells shows defective cell migration into the wound upon TMEM132A siRNA knockdown (still images at indicated time points). **(D)** Percentage of wound area closed calculated with initial cell-free space set as 100% in each group. **(E)** Paths of individual cells in wound healing assay tracked over time (upper panel, black dots indicate initial position while colored dots indicate final position). Middle panel shows cell paths tracked normalized to an initial position. Lower panel shows the radial histograms calculated from degree of displacement of each cell, with 90 degrees indicating a direct horizontal path from the starting point. Degrees were normalized to account for which side of the wound the cell originated. **(F)** Visualization of cells at the leading edge of the wound 12 hours post insert removal and quantification of percentage of Lamellipodia and Filopodia in control siRNA and TMEM132A knockdown cells.

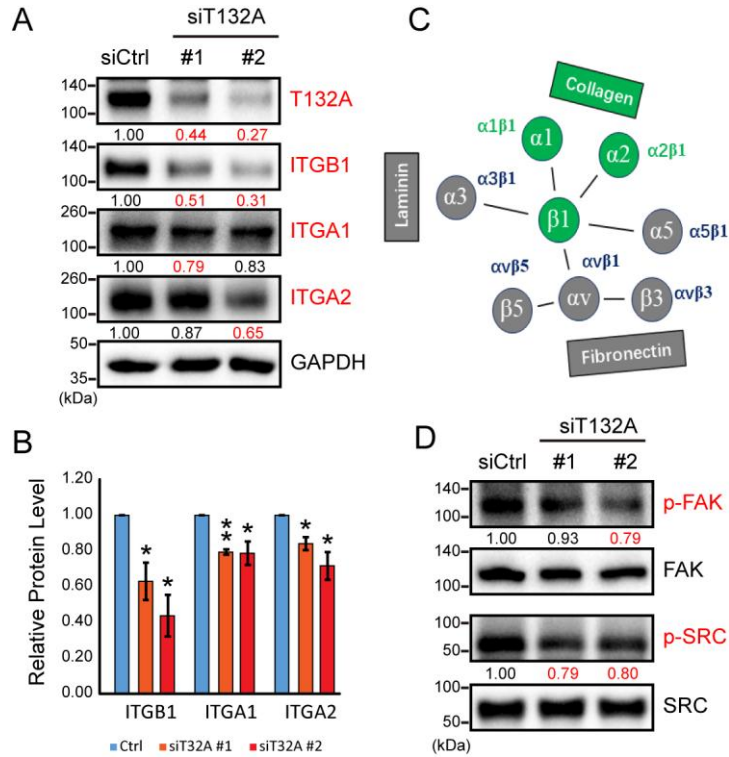

**Fig. 4. TMEM132A regulates integrin protein levels.** (A) Integrin proteins  $\alpha 1$ ,  $\alpha 2$ , and  $\beta 1$  which form the Collagen binding receptors, were repressed by TMEM132A knockdown in HeLa cells (48 hours post-transfection; GAPDH internal control). (B) Statistics of  $\beta 1$ ,  $\alpha 1$  and  $\alpha 2$  integrin protein levels from Western blot band intensity ( $n=3$ ) (C) Representative integrin heterodimers that bind different matrix proteins. Collagen binding integrin heterodimers that are repressed by TMEM132A loss are highlighted in green. (D) TMEM132A knockdown shows decreased phosphorylation of FAK and SRC in HeLa cells 48 hours post-transfection. Relative band intensity of phosphorylated proteins normalized to corresponding total proteins given below corresponding panel. Relative protein levels  $<0.80$  are shown in red.



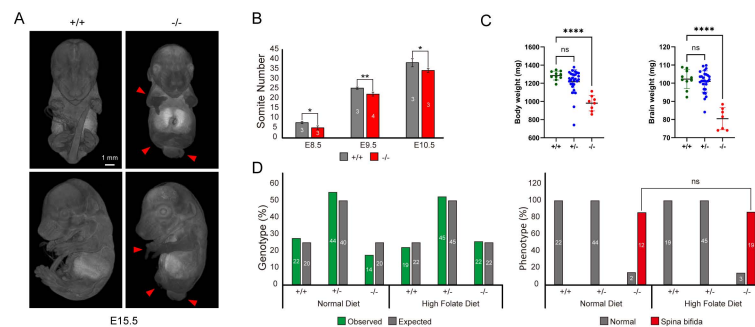

**Fig. S1. *Tmem132a* deletion results in spina bifida, limb defects, and developmental delay.** (A) Micro CT images of wild type and mutant embryos at E15.5 from <https://www.mousephenotype.org/embryoviewer/?mgi=MGI:2147810>. Red arrows indicate spina bifida, limb and digit defects in mutant embryos. There was no obvious preference of left or right side when the limb phenotype was unilateral. (B, C) Homozygous mutant embryos are developmentally delayed based on somite number in litter-matched embryos at E8.5, E9.5 and E10.5 (B, Student's *t*-test. \* $p \leq 0.05$ , \*\* $p \leq 0.01$ ), or body and brain weight at E18.5 (C, Student's *t*-test. \*\*\*\* $p \leq 0.0001$ ). (D) Multi-generational folic acid supplementation in diet does not alter the Mendelian ratios of embryos of each genotype or the incidence of spina bifida due to loss of TMEM132A (assessed at E10.5, *p*-value as calculated by Fisher's exact test; ns=not significant). Numbers of embryos examined is indicated in each column.

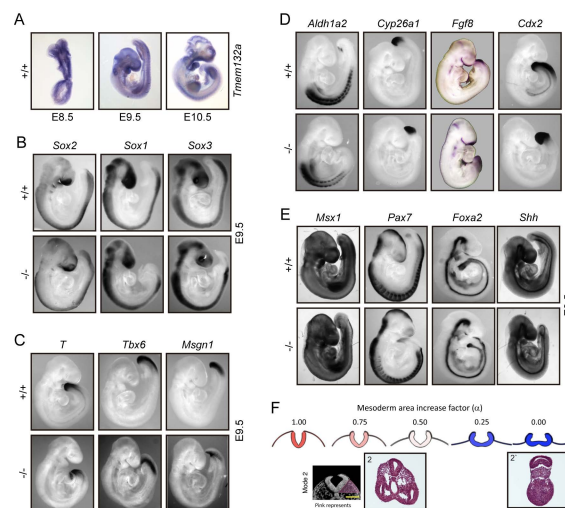

**Fig. S2. Assessment of neuromesodermal progenitors (NMPs) and patterning markers.** (A) Whole-mount in situ hybridization for *Tmem132a* expression in E8.5, E9.5 and E10.5 wild type embryos. (B, C) Whole-mount in situ hybridization showed relatively similar expression in wild type and homozygous mutant embryos at E9.5 for NMPs markers *Sox2* and *T* (*Brachyury*), neural lineage markers *Sox1* and *Sox3*, and mesodermal lineage markers *Tbx6* and *Msgn1*, suggesting no significant change in NMPs differentiation as a result of TMEM132A loss. (D, E) Whole-mount in situ hybridization showed relatively similar expression in wild type and mutant embryos at E9.5 of anterior-posterior patterning genes *Aldh1a2*, *Cyp26a1*, *Fgf8*, and *Cdx2* (D) and dorsal-ventral patterning genes *Msx1*, *Pax7*, *Foxa2* and *Shh* (E). (F) Top line: modeling the effect of mesoderm expansion on DLHP formation by de Goederen, *et al.* *PNAS*, 2022. Bottom line: (Left) Mode 2 tissue section with pink illustrating determination of mesoderm area by de Goederen, *et al.* *PNAS*, 2022. (Middle & right) Images of wild type (Fig. 2C panel 2) and *Tmem132a* mutant (Fig. 2C panel 2'). Panel 2' shows a mesoderm area increase factor of  $\alpha=0$ .



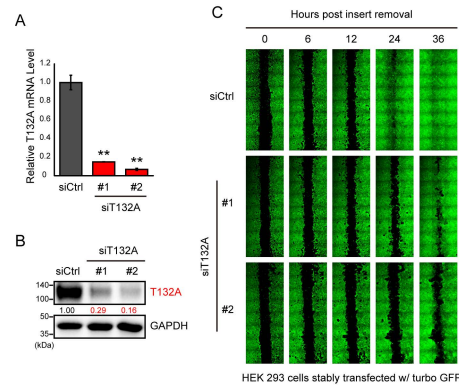

**Fig. S3. TMEM132A regulates directional cell migration in wound healing assay in HEK 293 cells stably transfected with turbo GFP. (A, B)** Real-time quantitative PCR **(A)** and immunoblotting **(B)** to assess the knockdown efficiency of siRNAs against TMEM132A or negative control in HEK 293 cells 48 hours post transfection. GAPDH serves as an internal control (for quantitative PCR,  $n \geq 3$ , Student's *t*-test.  $**p \leq 0.01$ ). Relative band intensity in immunoblotting assay normalized to GAPDH is given below the panel. **(C)** Wound healing assay performed in HEK 293 cells showed slower closing of the wound following knockdown of TMEM132A relative to negative control siRNA. Still images from videos at indicated time points are shown.

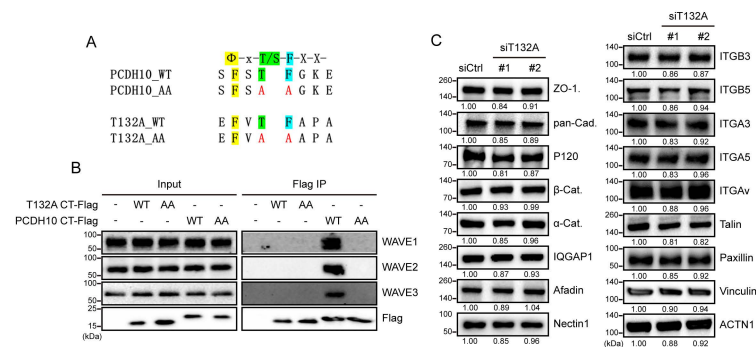

**Fig. S4. TMEM132A does not interact with the WAVE regulatory complex (WRC). (A)** WRC interacting receptor sequence (WIRS) and mutated form in C-terminus of human PCDH10, and the predicted WIRS and mutated form in mouse TMEM132A. **(B)** Overexpressed PCDH10, but not TMEM132A, interacts with WAVE1, 2 and 3 in HEK 293T cells, and disruption of the WIRS motif in PCDH10 abolishes this interaction. **(C)** Protein levels of apical tight junction protein ZO-1, the calcium-dependent adhesion junction proteins Cadherin(s), P120,  $\beta$ -Catenin,  $\alpha$ -Catenin and IQGAP1, calcium-independent adhesion junction proteins Afadin and Nectin1, as well as  $\alpha 3$ ,  $\alpha 5$ ,  $\alpha v$ ,  $\beta 3$ ,  $\beta 5$ , or other components of focal adhesion complex including Talin, Paxillin, Vinculin and ACTN1, were not affected by loss of TMEM132A in HeLa cells 48 hours post siRNA transfection. GAPDH in Figure 5A serves as an internal control.

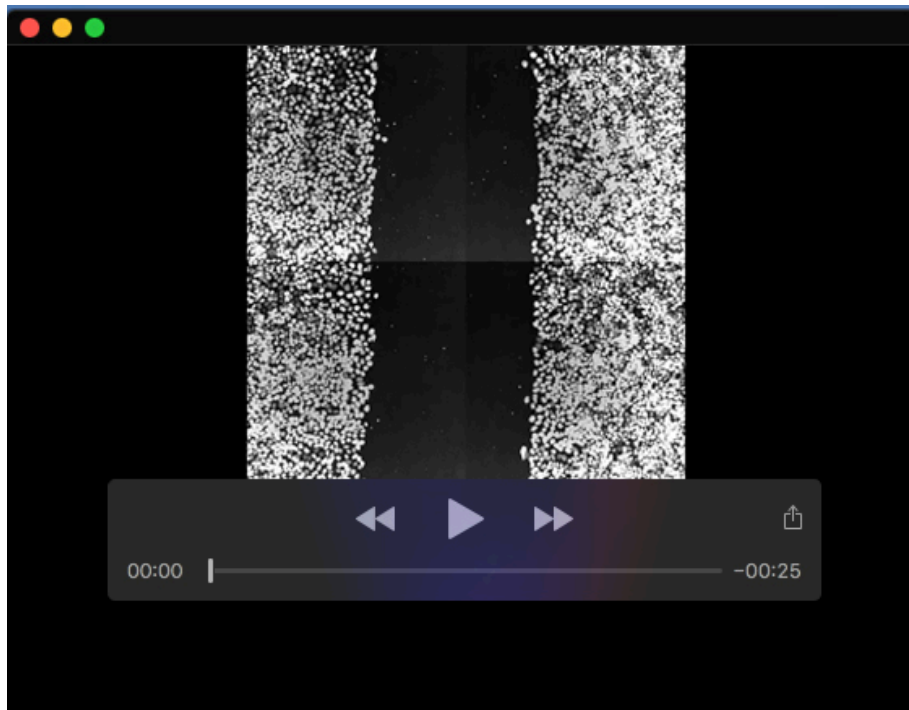

**Movie 1. Live fluorescent imaging of HeLa cells transfected with negative control siRNA (area 1 of 3).** Nuclei were visualized by SPY 505-DNA non-toxic staining (excitation: 512 nm, emission: 531 nm) and imaged using the green fluorescence channel (emission filter: 500-550 nm). Time-lapse microscopic images were taken every 10 minutes and 10 slides in Z-axis spanning approximately 15  $\mu\text{m}$  was captured and maximum projected, and 10 frames per second (fps) videos were generated.

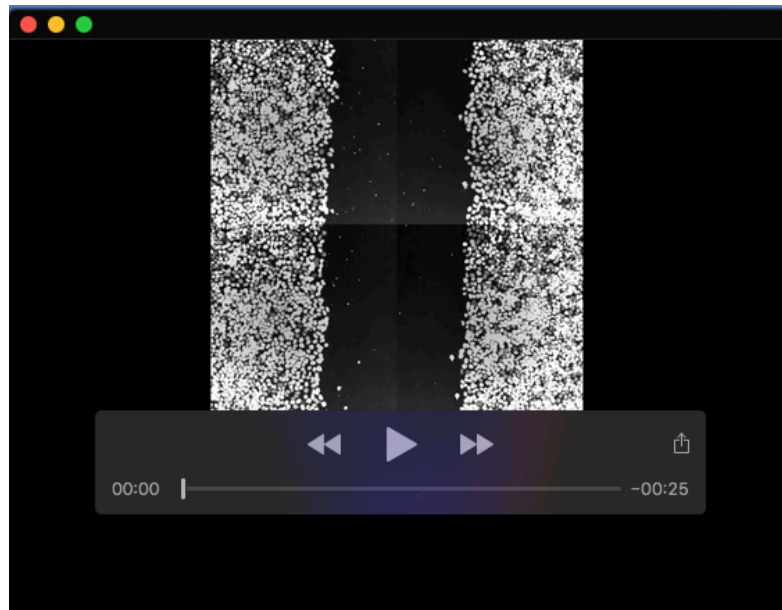

**Movie 2. Live fluorescent imaging of HeLa cells transfected with negative control siRNA (area 2 of 3).**

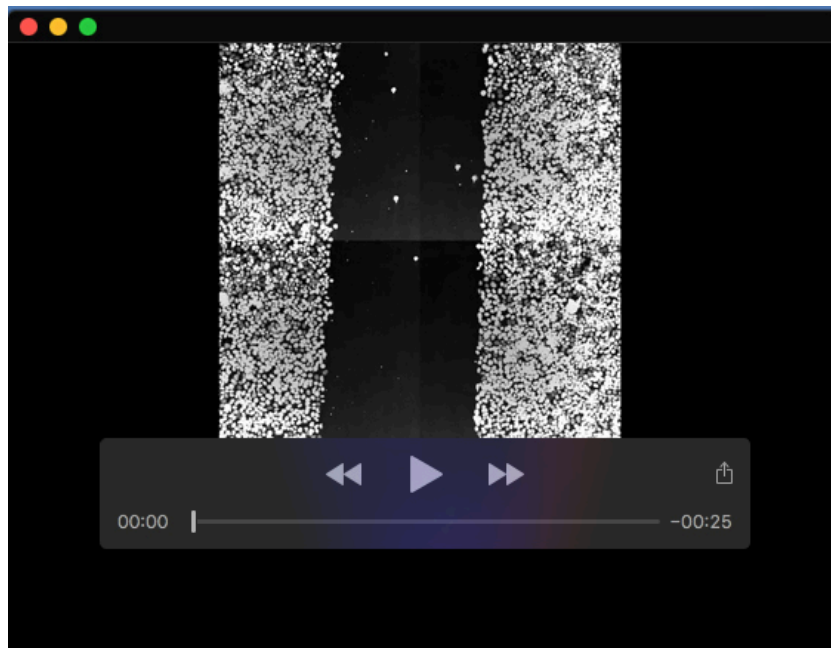

**Movie 3. Live fluorescent imaging of HeLa cells transfected with negative control siRNA (area 3 of 3).**

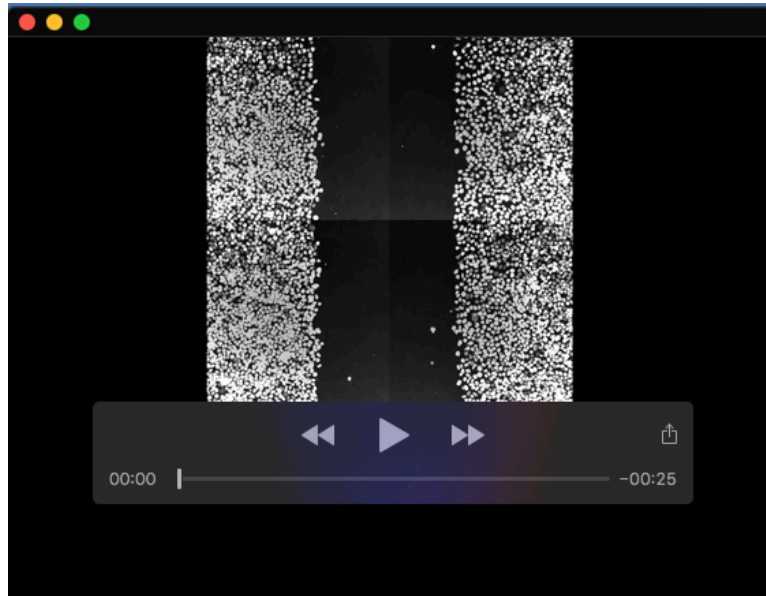

**Movie 4. Live fluorescent imaging of HeLa cells transfected with TMEM132A-specific siRNA #1 (area 1 of 3).** Nuclei were visualized by SPY 505-DNA non-toxic staining (excitation: 512 nm, emission: 531 nm) and imaged using the green fluorescence channel (emission filter: 500-550 nm). Time-lapse microscopic images were taken every 10 minutes and 10 slides in Z-axis spanning approximately 15  $\mu\text{m}$  was captured and maximum projected, and 10 fps videos were generated.

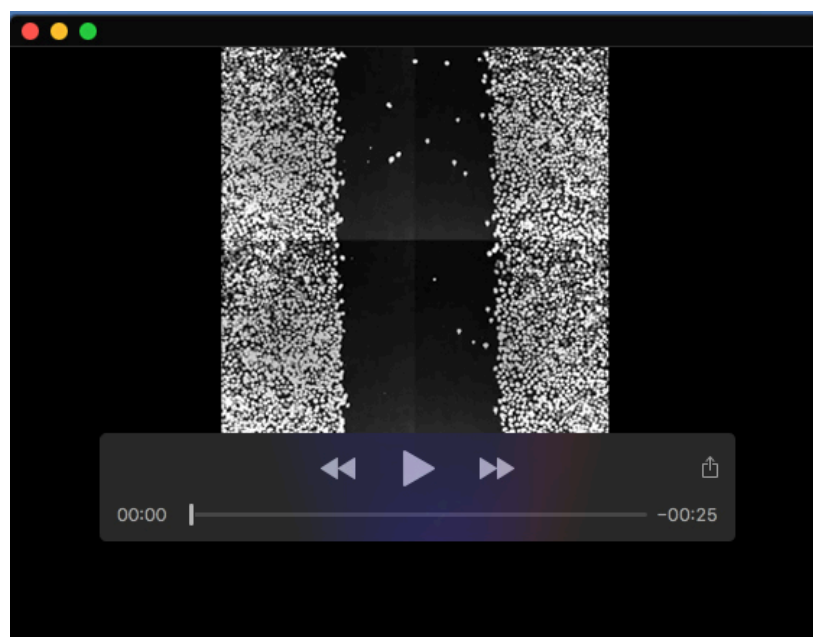

**Movie 5. Live fluorescent imaging of HeLa cells transfected with TMEM132A-specific siRNA #1 (area 2 of 3).**

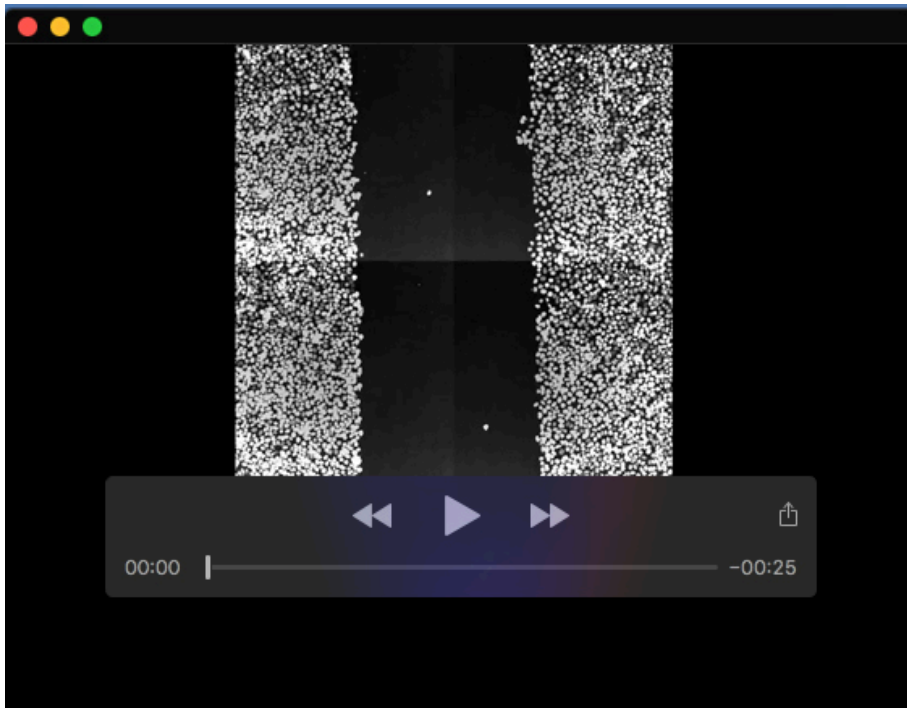

**Movie 6. Live fluorescent imaging of HeLa cells transfected with TMEM132A-specific siRNA #1 (area 3 of 3).**

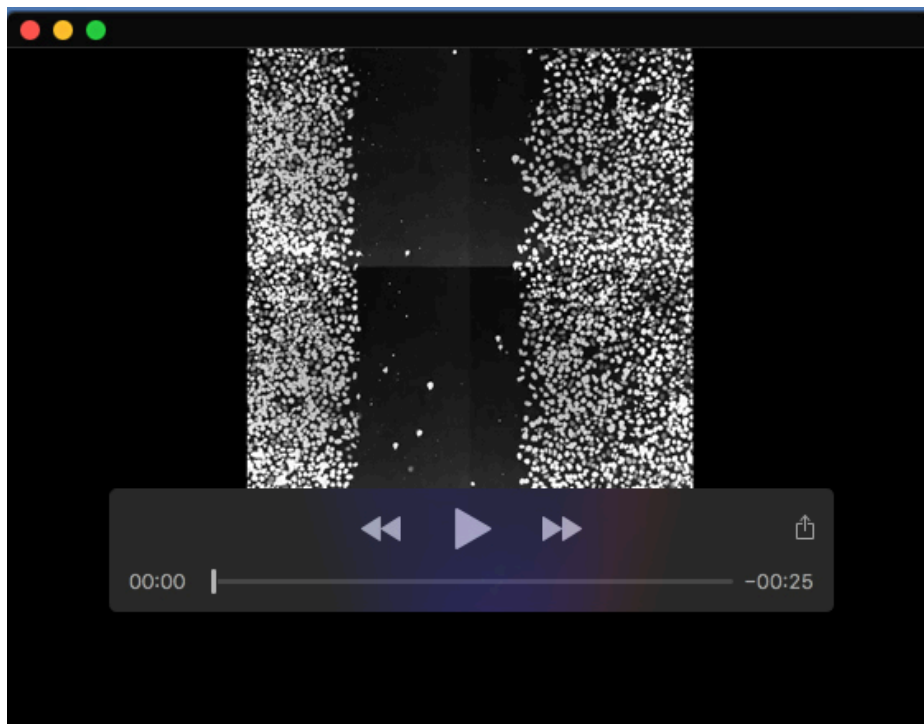

**Movie 7. Live fluorescent imaging of HeLa cells transfected with TMEM132A-specific siRNA #2 (area 1 of 3).** Nuclei were visualized by SPY 505-DNA non-toxic staining (excitation: 512 nm, emission: 531 nm) and imaged using the green fluorescence channel (emission filter: 500-550 nm). Time-lapse microscopic images were taken every 10 minutes and 10 slides in Z-axis spanning approximately 15  $\mu\text{m}$  was captured and maximum projected, and 10 fps videos were generated.

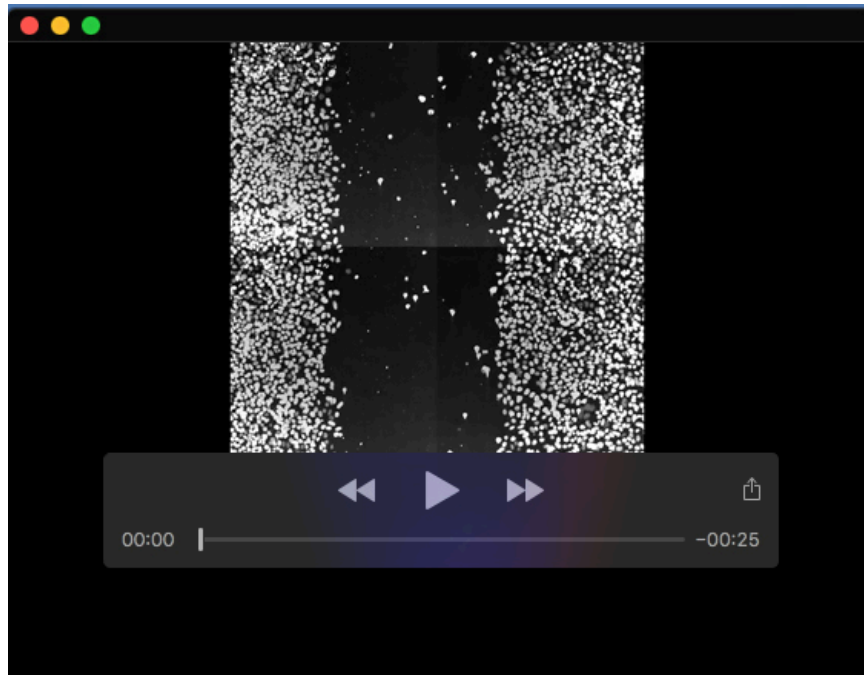

**Movie 8. Live fluorescent imaging of HeLa cells transfected with TMEM132A-specific siRNA #2 (area 2 of 3).**

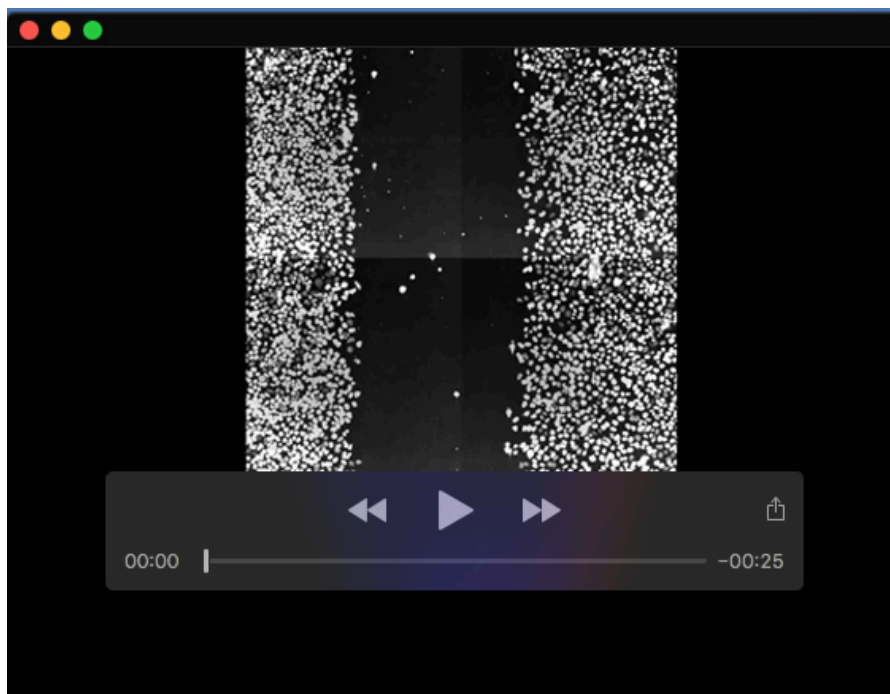

**Movie 9. Live fluorescent imaging of HeLa cells transfected with TMEM132A-specific siRNA #2 (area 3 of 3).**



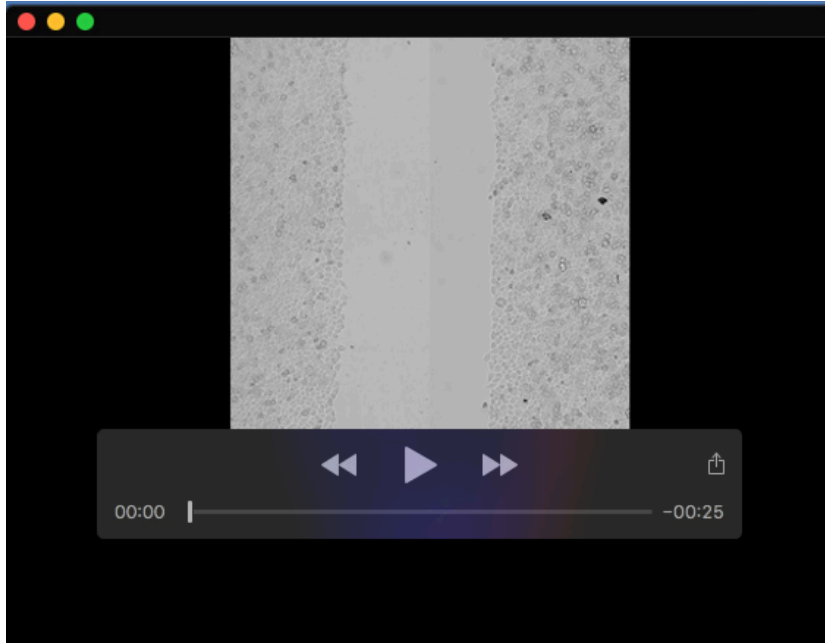

**Movie 10. Live imaging of HeLa cells transfected with negative control siRNA in bright field.** The same area as shown in supplementary movie 1 were also captured by bright field phase contrast microscopy. Time-lapse microscopic images were taken every 10 minutes and 10 slides in Z-axis spanning approximately 15  $\mu\text{m}$  was captured and maximum projected, and 10 fps videos were generated.

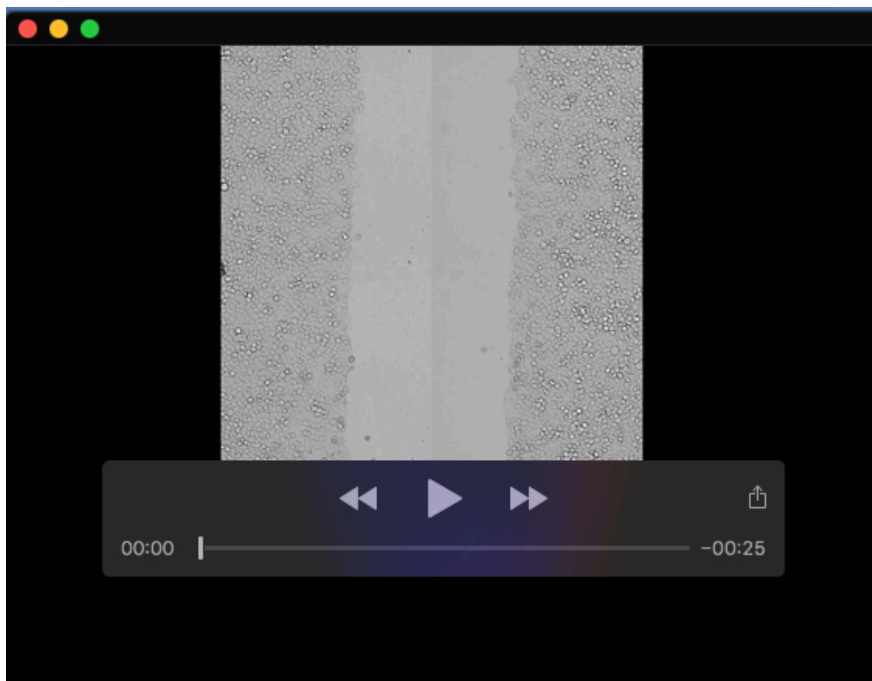

**Movie 11. Live imaging of HeLa cells transfected with negative control siRNA in bright field.** The same area as shown in supplementary movie 2.

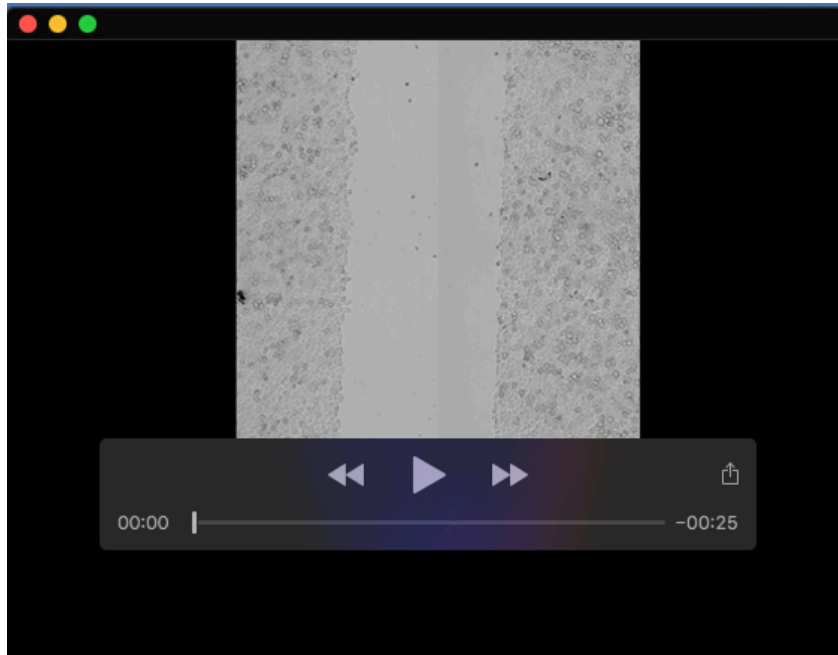

**Movie 12. Live imaging of HeLa cells transfected with negative control siRNA in bright field.** The same area as shown in supplementary movie 3.

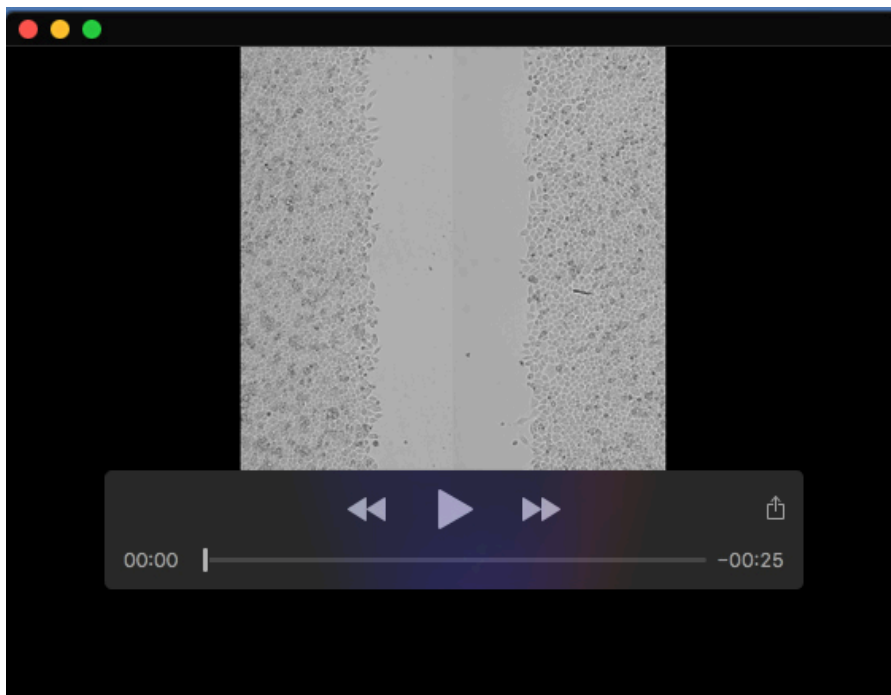

**Movie 13. Live imaging of HeLa cells transfected with TMEM132A-specific siRNA #1 in bright field.** The same area as shown in supplementary movie 4 were also captured by bright field phase contrast microscopy. Time-lapse microscopic images were taken every 10 minutes and 10 slides in Z-axis spanning approximately 15  $\mu\text{m}$  was captured and maximum projected, and 10 fps videos were generated.

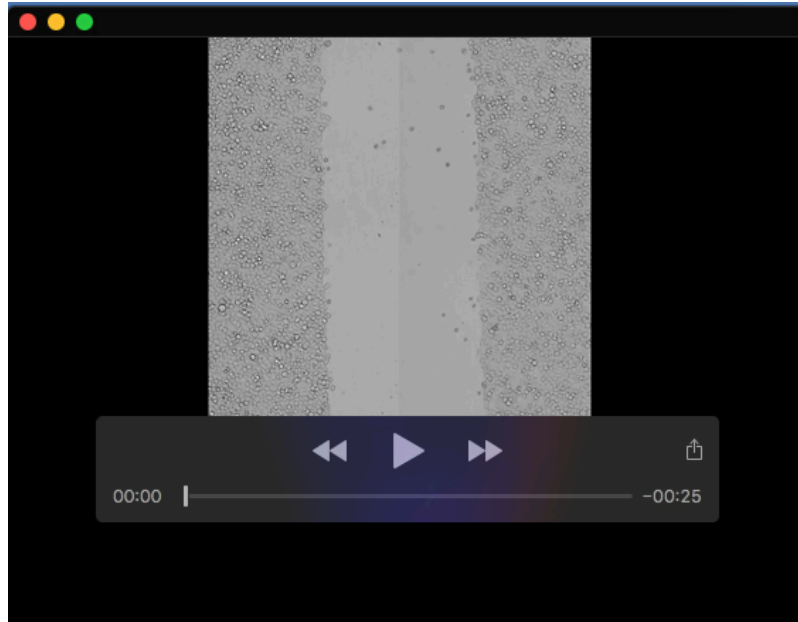

**Movie 14.** Live imaging of HeLa cells transfected with TMEM132A-specific siRNA #1 in bright field. The same area as shown in supplementary movie 5.

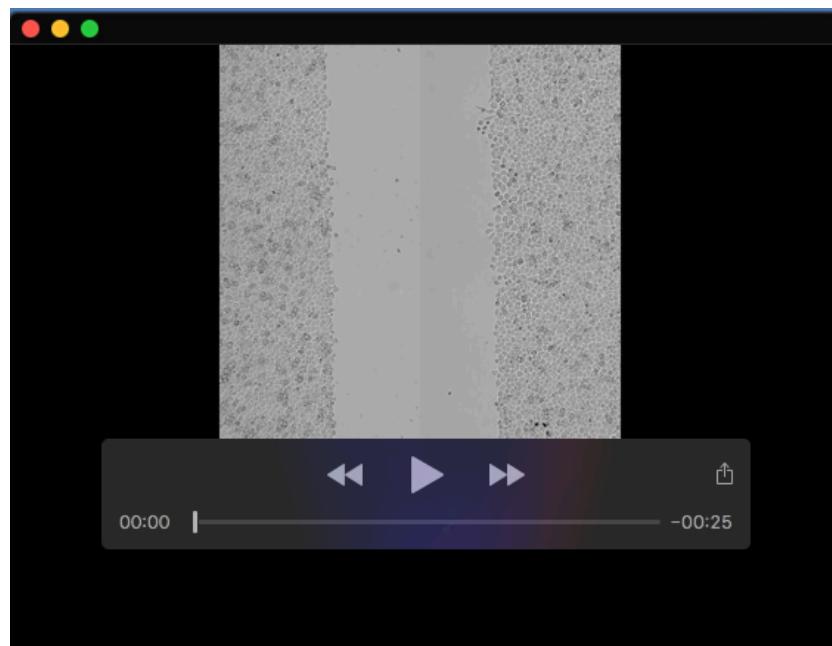

**Movie 15.** Live imaging of HeLa cells transfected with TMEM132A-specific siRNA #1 in bright field. The same area as shown in supplementary movie 6.

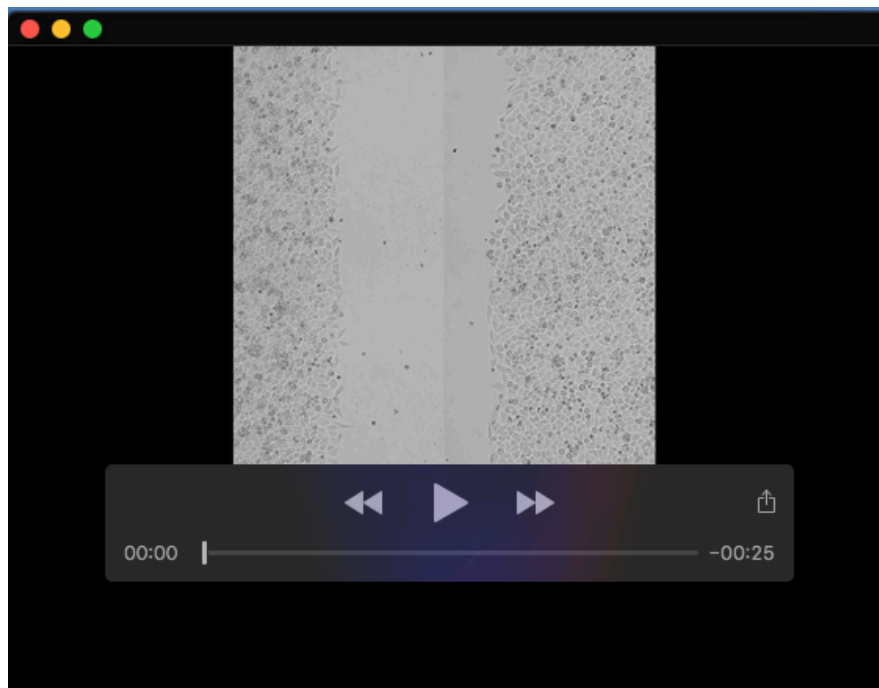

**Movie 16. Live imaging of HeLa cells transfected with TMEM132A-specific siRNA #2 in bright field.** The same area as shown in supplementary movie 7 were also captured by bright field phase contrast microscopy. Time-lapse microscopic images were taken every 10 minutes and 10 slides in Z-axis spanning approximately 15  $\mu\text{m}$  was captured and maximum projected, and 10 fps videos were generated.

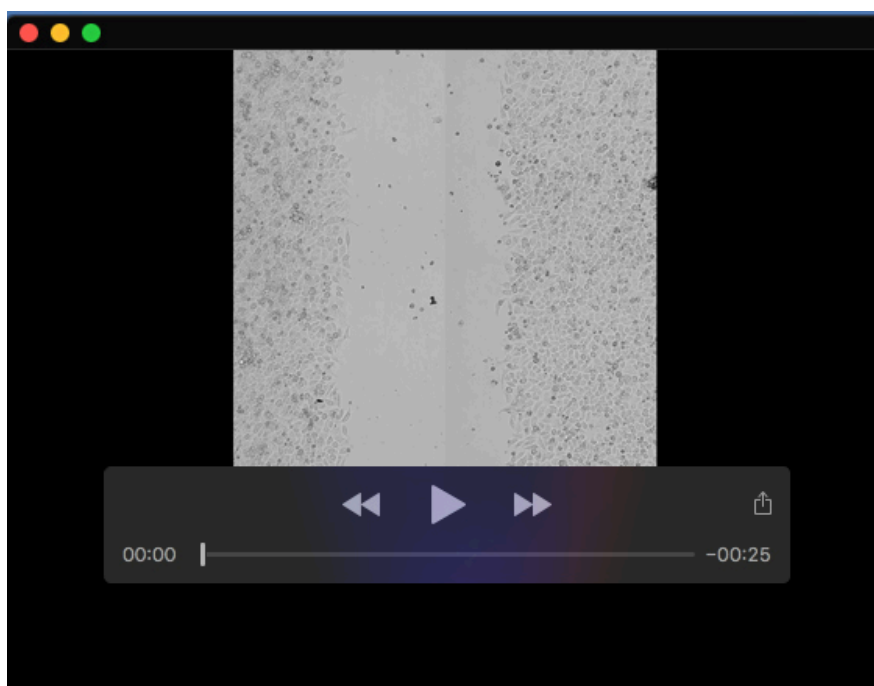

**Movie 17. Live imaging of HeLa cells transfected with TMEM132A-specific siRNA #2 in bright field.** The same area as shown in supplementary movie 8.

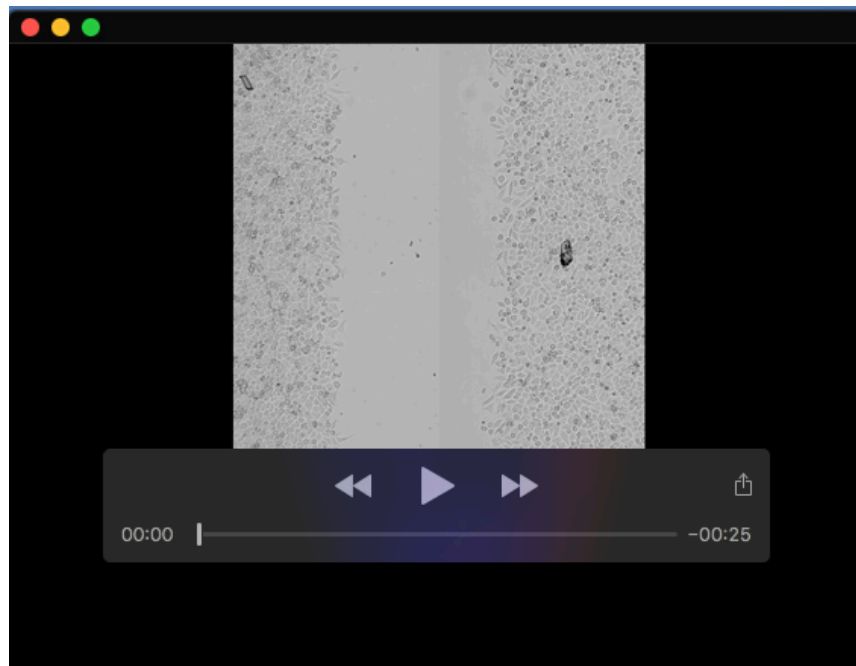

**Movie 18. Live imaging of HeLa cells transfected with TMEM132A-specific siRNA #2 in bright field.** The same area as shown in supplementary movie 9.

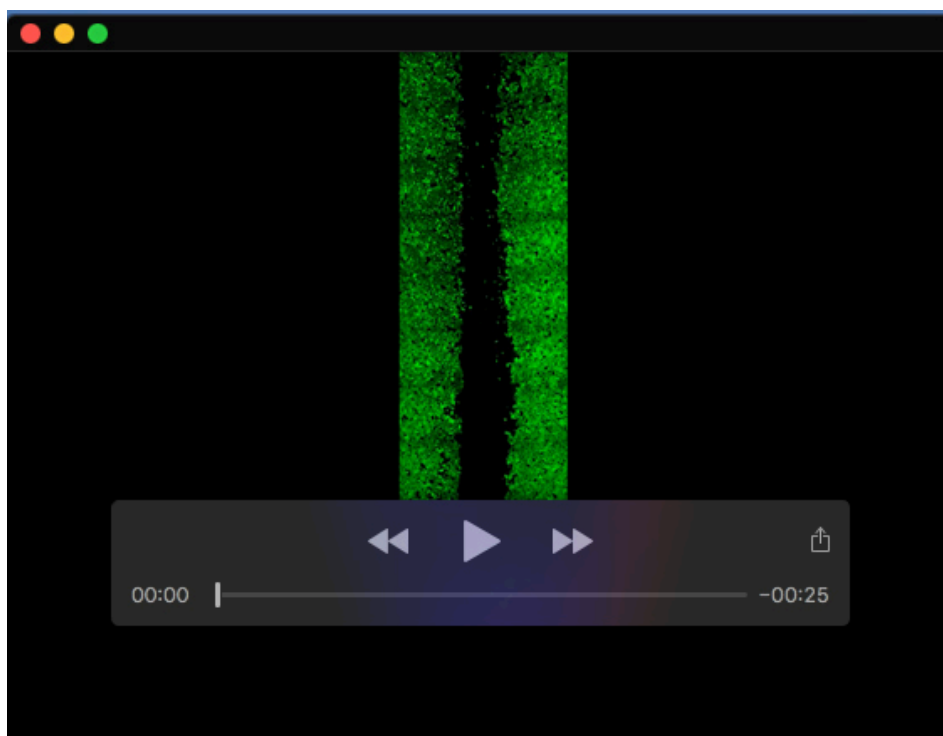

**Movie 19. Live fluorescent imaging of HEK 293 cells transfected with turbo GFP (excitation: 482 nm, emission: 502 nm) and negative control siRNA.** Microscopic images were captured through green fluorescence channel (emission filter: 500-550 nm). Time-lapse microscopic images were taken every 10 minutes and 10 slides in Z-axis spanning approximately 15  $\mu\text{m}$  was captured and maximum projected, and 10 fps videos were generated.

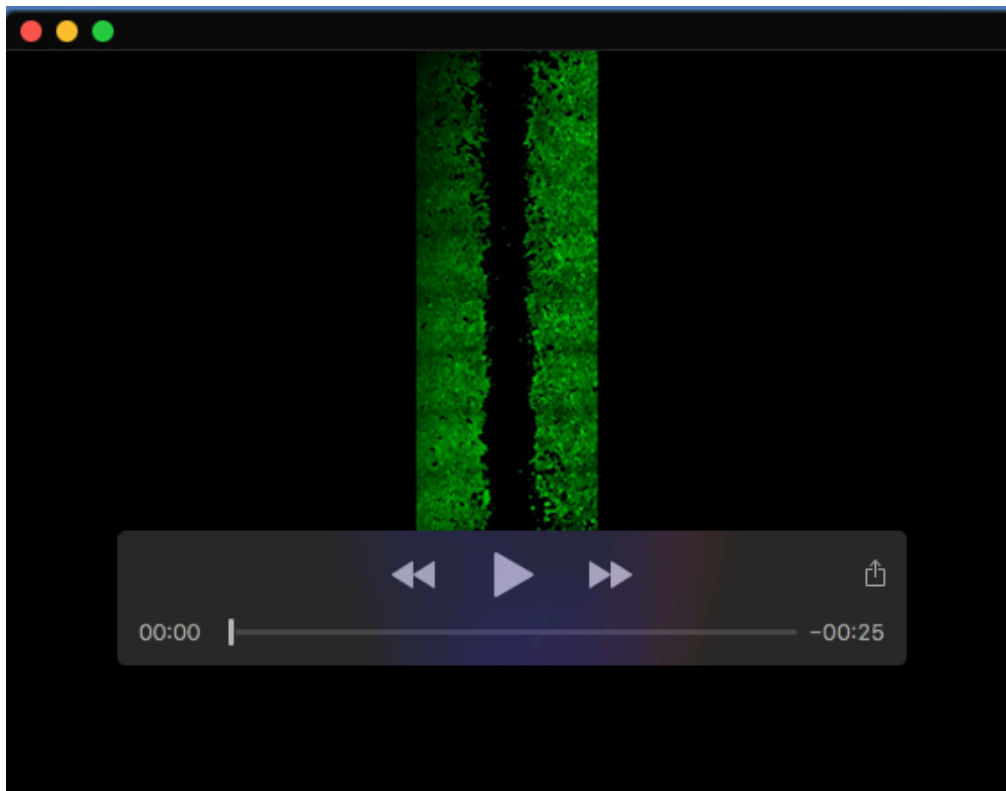

**Movie 20. Live fluorescent imaging of HEK 293 cells transfected with turbo GFP** (excitation: 482 nm, emission: 502 nm) and TMEM132A-specific siRNA #1. Microscopic images were captured through green fluorescence channel (emission filter: 500- 550 nm). Time-lapse microscopic images were taken every 10 minutes and 10 slides in Z-axis spanning approximately 15  $\mu\text{m}$  was captured and maximum projected, and 10 fps videos were generated.



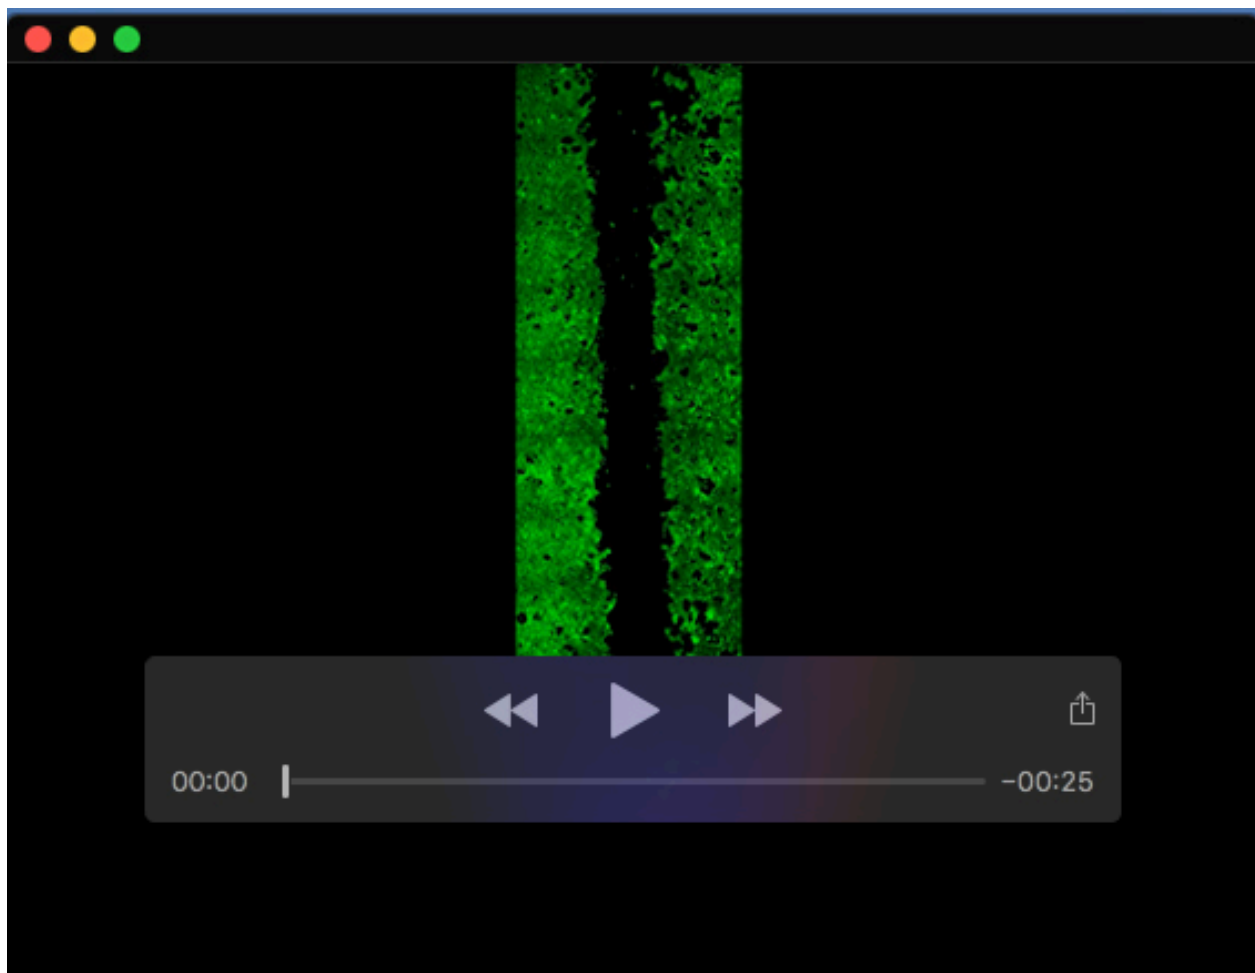

**Movie 21. Live fluorescent imaging of HEK 293 cells transfected with turbo GFP (excitation: 482 nm, emission: 502 nm) and TMEM132A-specific siRNA #2.** Microscopic images were captured through green fluorescence channel (emission filter: 500- 550 nm). Time-lapse microscopic images were taken every 10 minutes and 10 slides in Z-axis spanning approximately 15  $\mu\text{m}$  was captured and maximum projected, and 10 fps videos were generated.
